# Supplementary material
Source: PubMed Central journal article supplement (PMC4944662)
Supplement: mmc1.pdf [file mmc1.pdf]

**Biophysical Journal, Volume 111**

**Supplemental Information**

**Characterization of Zebrafish Cardiac and Slow Skeletal Troponin C Paralogs by MD Simulation and ITC**

**Charles M. Stevens, Kaveh Rayani, Christine E. Genge, Gurpreet Singh, Bo Liang, Janine M. Roller, Cindy Li, Alison Yueh Li, D. Peter Tieleman, Filip van Petegem, and Glen F. Tibbits**

**Table S1. Dimensions, Ions, and water molecules for each simulation system**

|               |                       | 100 ns<br>Ca <sup>2+</sup> -bound | PMF                 | 200 ns<br>TnC+Ca <sup>2+</sup> +Tnl <sub>sw</sub> | 1 $\mu$ s<br>Ca <sup>2+</sup> -free | 1 $\mu$ s<br>Ca <sup>2+</sup> -bound |
|---------------|-----------------------|-----------------------------------|---------------------|---------------------------------------------------|-------------------------------------|--------------------------------------|
| cTnC<br>18°C  | Box Dimensions (nm)   | 5.96 x 5.96 x 5.96                | 14.94 x 5.98 x 5.98 | 7.68 x 7.68 x 7.68                                | 5.96 x 5.96 x 5.96                  | 5.96 x 5.96 x 5.96                   |
|               | K <sup>+</sup> Ions   | 14                                | 14                  | 11                                                | 15                                  | 14                                   |
|               | Cl <sup>-</sup> Ions  | 1                                 | 1                   | 1                                                 | 0                                   | 1                                    |
|               | Ca <sup>2+</sup> Ions | 1                                 | 1                   | 1                                                 | 0                                   | 1                                    |
|               | Water Molecules       | 6612                              | 17349               | 14555                                             | 6655                                | 6612                                 |
| cTnC<br>28°C  | Box Dimensions (nm)   | 5.97 x 5.97 x 5.97                | 14.99 x 5.99 x 5.99 | 7.72 x 7.72 x 7.72                                | 5.98 x 5.98 x 5.98                  | 5.97 x 5.97 x 5.97                   |
|               | K <sup>+</sup> Ions   | 14                                | 13                  | 11                                                | 15                                  | 14                                   |
|               | Cl <sup>-</sup> Ions  | 1                                 | 0                   | 1                                                 | 0                                   | 1                                    |
|               | Ca <sup>2+</sup> Ions | 1                                 | 1                   | 1                                                 | 0                                   | 1                                    |
|               | Water Molecules       | 6612                              | 17352               | 14555                                             | 6655                                | 6612                                 |
| ssTnC<br>18°C | Box Dimensions (nm)   | 5.95 x 5.95 x 5.95                | 14.95 x 5.98 x 5.98 | 7.68 x 7.68 x 7.68                                | 5.97 x 5.97 x 5.97                  | 5.96 x 5.96 x 5.96                   |
|               | K <sup>+</sup> Ions   | 15                                | 14                  | 12                                                | 16                                  | 15                                   |
|               | Cl <sup>-</sup> Ions  | 1                                 | 0                   | 1                                                 | 0                                   | 1                                    |
|               | Ca <sup>2+</sup> Ions | 1                                 | 1                   | 1                                                 | 0                                   | 1                                    |
|               | Water Molecules       | 6612                              | 17343               | 14555                                             | 6657                                | 6612                                 |
| ssTnC<br>28°C | Box Dimensions (nm)   | 5.97 x 5.97 x 5.97                | 15.00 x 6.00 x 6.00 | 7.72 x 7.72 x 7.72                                | 5.98 x 5.98 x 5.98                  | 5.97 x 5.97 x 5.97                   |
|               | K <sup>+</sup> Ions   | 15                                | 14                  | 12                                                | 16                                  | 15                                   |
|               | Cl <sup>-</sup> Ions  | 1                                 | 0                   | 1                                                 | 0                                   | 1                                    |
|               | Ca <sup>2+</sup> Ions | 1                                 | 1                   | 1                                                 | 0                                   | 1                                    |
|               | Water Molecules       | 6612                              | 17340               | 14555                                             | 6657                                | 6612                                 |

Table S2. Homology model quality indicators for representative structures from 100 ns TnC+Ca<sup>2+</sup> simulations.

|                                                     | cTnC (18°C) | cTnC (28°C) | ssTnC (18°C) | ssTnC (28°C) |
|-----------------------------------------------------|-------------|-------------|--------------|--------------|
| <b>RAMPAGE</b>                                      |             |             |              |              |
| <b>Favored</b>                                      | 85 (98.84%) | 83 (96.51%) | 84 (97.67%)  | 86 (100.00%) |
| <b>Allowed</b>                                      | 1 (1.16%)   | 3 (3.49%)   | 2 (2.33%)    | 0 (0.00%)    |
| <b>Outlier</b>                                      | 0 (0.00%)   | 0 (0.00%)   | 0 (0.00%)    | 0 (0.00%)    |
| <b>PROCHECK</b>                                     |             |             |              |              |
| <b>Bad Backbone Bonds</b>                           | 0.00%       | 0.00%       | 0.00%        | 0.00%        |
| <b>Bad Backbone Angles</b>                          | 4.60%       | 5.40%       | 4.10%        | 4.60%        |
| <b>Bad Contacts</b>                                 | 0           | 0           | 0            | 0            |
| <b>Molprobrity Score</b>                            | 1.62        | 1.69        | 1.54         | 1.70         |
| <b>QMEAN Score</b>                                  | 0.627       | 0.669       | 0.767        | 0.69         |
| <b>Whatcheck Structure Z-Score</b>                  |             |             |              |              |
| <b>1st Generation Packing</b>                       | -1.836      | -1.079      | -1.237       | -1.322       |
| <b>2n Generation Packing</b>                        | -0.89       | -1.245      | -1.349       | -1.079       |
| <b><math>\chi_1/\chi_2</math> Rotamer Normality</b> | -1.45       | -1.685      | -2.472       | -1.836       |
| <b>Backbone Conformation</b>                        | 0.672       | 0.93        | 1.177        | 0.662        |
| <b>Inside/Outside</b>                               | 0.955       | 0.966       | 0.926        | 0.999        |
| <b>Whatcheck RMS Z-Score</b>                        |             |             |              |              |
| <b>Bond Lengths</b>                                 | 0.644       | 0.635       | 0.642        | 0.662        |
| <b>Bond Angles</b>                                  | 1.173       | 1.175       | 1.109        | 1.177        |
| <b>Omega Angle Restraints</b>                       | 1.471       | 1.235       | 1.422        | 1.369        |
| <b>Side Chain Planarity</b>                         | 1.886       | 1.732       | 1.488        | 1.789        |
| <b>Improper Dihedral</b>                            | 1.175       | 1.163       | 1.211        | 1.255        |
| <b>Distribution</b>                                 |             |             |              |              |

**Table S3. Homology model quality indicators for representative structures of TnC+Ca<sup>2+</sup> in complex with Tnl<sub>sw</sub>.**

|                                                      | cTnC (18°C) | cTnC (28°C) | ssTnC (18°C) | ssTnC (28°C) |
|------------------------------------------------------|-------------|-------------|--------------|--------------|
| <b>RAMPAGE</b>                                       |             |             |              |              |
| <b>Favored</b>                                       | 99 (99.00%) | 96 (96.00%) | 94 (94.00%)  | 98 (98.00%)  |
| <b>Allowed</b>                                       | 1 (1.00%)   | 4 (4.00%)   | 6 (6.00%)    | 2 (2.00%)    |
| <b>Outlier</b>                                       | 0 (0.00%)   | 0 (0.00%)   | 0 (0.00%)    | 0 (0.00%)    |
| <b>PROCHECK</b>                                      |             |             |              |              |
| <b>Bad Backbone Bonds</b>                            | 0.00%       | 0.20%       | 0.00 %       | 0.00%        |
| <b>Bad Backbone Angles</b>                           | 4.30%       | 4.30%       | 5.00%        | 6.40%        |
| <b>Bad Contacts</b>                                  | 0.00%       | 0.00%       | 0.00%        | 0.00%        |
| <b>Molprobitry Score</b>                             | 1.22        | 1.59        | 1.93         | 2.25         |
| <b>QMEAN Score</b>                                   | 0.563       | 0.512       | 0.515        | 0.463        |
| <b>Whatcheck Structure Z-Score</b>                   |             |             |              |              |
| <b>1st Generation Packing</b>                        | -1.027      | -0.607      | -1.175       | -1.329       |
| <b>2n Generation Packing</b>                         | 0.614       | 0.548       | -1.175       | -0.09        |
| <b>χ<sub>1</sub>/χ<sub>2</sub> Rotamer Normality</b> | -1.924      | 1.122       | -0.118       | -2.428       |
| <b>Backbone Conformation</b>                         | 0.856       | 0.959       | -1.724       | 1.234        |
| <b>Inside/Outside</b>                                | 0.988       | 0.959       | 0.928        | 1.077        |
| <b>Whatcheck RMS Z-Score</b>                         |             |             |              |              |
| <b>Bond Lengths</b>                                  | 0.505       | 0.600       | 0.485        | 0.547        |
| <b>Bond Angles</b>                                   | -1.027      | 1.157       | 1.216        | 1.223        |
| <b>Omega Angle Restraints</b>                        | 1.297       | 1.419       | 1.608        | 1.638        |
| <b>Side Chain Planarity</b>                          | 2.012       | 1.767       | 1.972        | 2.083        |
| <b>Improper Dihedral Distribution</b>                | 1.305       | 1.19        | 1.447        | 1.281        |

Table S4. Homology model quality indicators for representative structures of Ca<sup>2+</sup>-free TnC from 1  $\mu$ s simulations.

|                                                     | cTnC (18°C) | cTnC (28°C) | ssTnC (18°C) | ssTnC (28°C) |
|-----------------------------------------------------|-------------|-------------|--------------|--------------|
| <b>RAMPAGE</b>                                      |             |             |              |              |
| <b>Favored</b>                                      | 85 (98.80%) | 83 (96.50%) | 84 (97.70%)  | 84 (97.70%)  |
| <b>Allowed</b>                                      | 1 (1.20%)   | 3 (3.50%)   | 2 (23.00%)   | 2 (23.00%)   |
| <b>Outlier</b>                                      | 0 (0.00%)   | 0 (0.00%)   | 0 (0.00%)    | 0 (0.00%)    |
| <b>PROCHECK</b>                                     |             |             |              |              |
| <b>Bad Backbone Bonds</b>                           | 0.00%       | 0.00%       | 0.00%        | 0.00%        |
| <b>Bad Backbone Angles</b>                          | 5.60%       | 4.60%       | 4.30%        | 4.60%        |
| <b>Bad Contacts</b>                                 | 0.00%       | 0.00%       | 0.00%        | 0.00%        |
| <b>Molprobrity Score</b>                            | 0.83        | 0.82        | 0.57         | 1.37         |
| <b>QMEAN Score</b>                                  | 0.842       | 0.605       | 0.794        | 0.72         |
| <b>Whatcheck Structure Z-Score</b>                  |             |             |              |              |
| <b>1st Generation Packing</b>                       | -0.916      | -0.814      | -0.855       | -1.237       |
| <b>2n Generation Packing</b>                        | -0.658      | -0.518      | -0.365       | -1.074       |
| <b><math>\chi_1/\chi_2</math> Rotamer Normality</b> | -2.497      | -2.265      | -1.093       | -0.818       |
| <b>Backbone Conformation</b>                        | 1.771       | 1.23        | 1.23         | 0.934        |
| <b>Inside/Outside</b>                               | 0.961       | 0.984       | 0.982        | 0.955        |
| <b>Whatcheck RMS Z-Score</b>                        |             |             |              |              |
| <b>Bond Lengths</b>                                 | 0.513       | 0.553       | 0.551        | 0.501        |
| <b>Bond Angles</b>                                  | 1.156       | 1.241       | 1.17         | 1.232        |
| <b>Omega Angle Restraints</b>                       | 1.428       | 1.377       | 1.512        | 1.38         |
| <b>Side Chain Planarity</b>                         | 1.524       | 1.69        | 1.774        | 1.496        |
| <b>Improper Dihedral Distribution</b>               | 1.177       | 1.206       | 1.16         | 1.224        |

**Table S5. Homology model quality indicators for representative structures of TnC+Ca<sup>2+</sup> from 1  $\mu$ s simulations.**

|                                                     | cTnC (18°C) | cTnC (28°C) | ssTnC (18°C) | ssTnC (28°C) |
|-----------------------------------------------------|-------------|-------------|--------------|--------------|
| <b>RAMPAGE</b>                                      |             |             |              |              |
| <b>Favored</b>                                      | 84 (97.70%) | 85 (98.80%) | 81 (94.20%)  | 85 (98.80%)  |
| <b>Allowed</b>                                      | 2 (23.00%)  | 1 (1.20%)   | 5 (5.80%)    | 1 (1.20%)    |
| <b>Outlier</b>                                      | 0 (0.00%)   | 0 (0.00%)   | 0 (0.00%)    | 0 (0.00%)    |
| <b>PROCHECK</b>                                     |             |             |              |              |
| <b>Bad Backbone Bonds</b>                           | 0.00%       | 0.00%       | 0.00%        | 0.00%        |
| <b>Bad Backbone Angles</b>                          | 7.10%       | 7.60%       | 6.10%        | 4.40%        |
| <b>Bad Contacts</b>                                 | 0.00%       | 0.00%       | 0.00%        | 0.00%        |
| <b>Molprobrity Score</b>                            | 1.2         | 0.57        | 1.08         | 0.81         |
| <b>QMEAN Score</b>                                  | 0.664       | 0.584       | 0.718        | 0.684        |
| <b>Whatcheck Structure Z-Score</b>                  |             |             |              |              |
| <b>1st Generation Packing</b>                       | -0.875      | -1.506      | -2.138       | -0.616       |
| <b>2n Generation Packing</b>                        | -0.398      | -1.155      | -2.061       | -0.606       |
| <b><math>\chi_1/\chi_2</math> Rotamer Normality</b> | -3.038      | -2.781      | -3.188       | -2.315       |
| <b>Backbone Conformation</b>                        | 1.06        | 1.013       | 0.356        | 0.948        |
| <b>Inside/Outside</b>                               | 1.019       | 0.985       | 0.993        | 0.95         |
| <b>Whatcheck RMS Z-Score</b>                        |             |             |              |              |
| <b>Bond Lengths</b>                                 | 0.488       | 0.525       | 0.542        | 0.495        |
| <b>Bond Angles</b>                                  | 1.265       | 1.273       | 1.209        | 1.122        |
| <b>Omega Angle Restraints</b>                       | 1.73        | 1.554       | 1.57         | 1.786        |
| <b>Side Chain Planarity</b>                         | 2.332       | 1.775       | 1.686        | 1.797        |
| <b>Improper Dihedral Distribution</b>               | 1.441       | 1.31        | 1.224        | 1.258        |

**Table S6. Cumulative interhelical angle frequencies combined over replicated long timescale simulations.**

| <b>Paralog</b>         | <b>cTnC</b> | <b>cTnC</b> | <b>cTnC</b> | <b>cTnC</b> | <b>ssTnC</b> | <b>ssTnC</b> | <b>ssTnC</b> | <b>ssTnC</b> |
|------------------------|-------------|-------------|-------------|-------------|--------------|--------------|--------------|--------------|
| <b>Temperature</b>     | <b>18°C</b> | <b>28°C</b> | <b>18°C</b> | <b>28°C</b> | <b>18°C</b>  | <b>28°C</b>  | <b>18°C</b>  | <b>28°C</b>  |
| <b>Ca<sup>2+</sup></b> |             |             | +           | +           |              |              | +            | +            |
| <b>&lt;90</b>          | 0           | 0           | 0           | 0           | 0            | 0            | 0            | 0            |
| <b>&lt;95</b>          | 0           | 0           | 0           | 10          | 0            | 0            | 0            | 0            |
| <b>&lt;100</b>         | 0           | 0           | 0           | 66          | 0            | 0            | 0            | 0            |
| <b>&lt;105</b>         | 0           | 7           | 0           | 283         | 0            | 0            | 0            | 1            |
| <b>&lt;110</b>         | 0           | 36          | 0           | 876         | 0            | 0            | 0            | 4            |
| <b>&lt;115</b>         | 2           | 121         | 0           | 1743        | 2            | 4            | 10           | 56           |
| <b>&lt;120</b>         | 25          | 447         | 1           | 2920        | 13           | 24           | 114          | 210          |
| <b>&lt;125</b>         | 205         | 2147        | 19          | 7330        | 109          | 540          | 1056         | 1189         |
| <b>&lt;130</b>         | 3123        | 9532        | 216         | 12210       | 2426         | 5932         | 5761         | 5745         |
| <b>&gt;130</b>         | 21666       | 15420       | 24744       | 5412        | 22456        | 18497        | 18142        | 18059        |

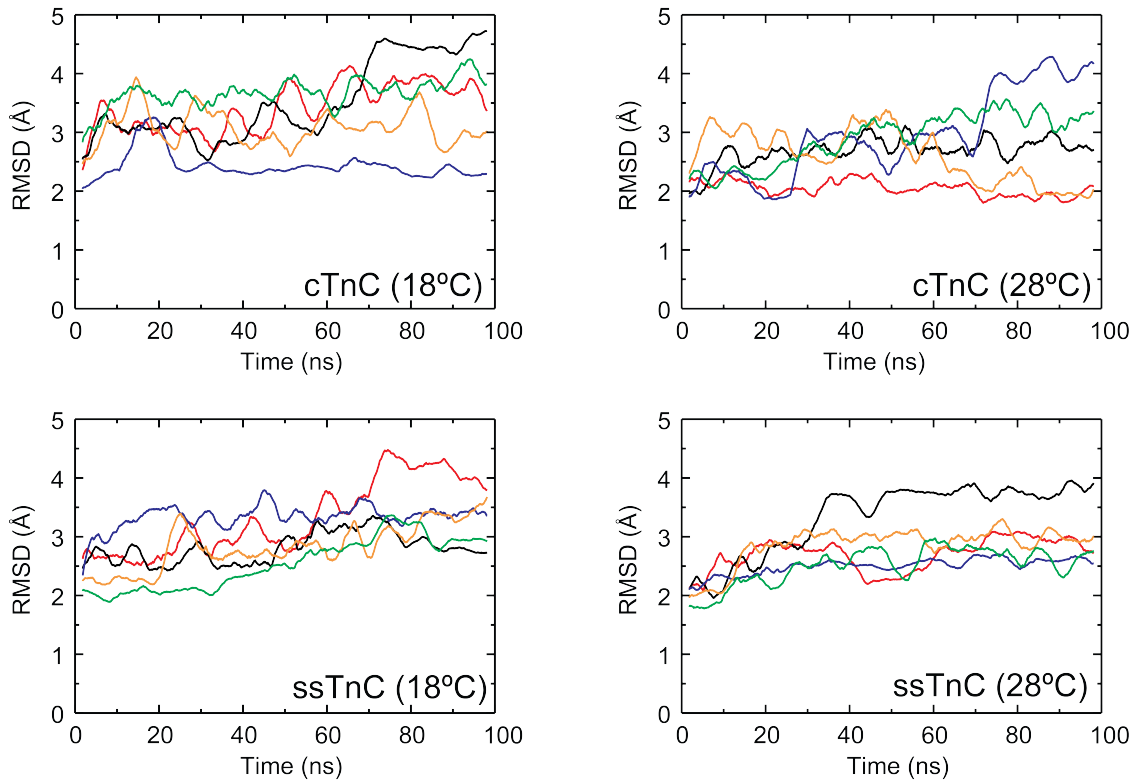

**Figure S1. RMSD as a function of time for 100 ns simulations of TnC+Ca<sup>2+</sup> that preceded PMF calculations for each temperature paralog combination. These indicate that each of the simulations has diverged substantially from the starting coordinates. Plots are a running average over 0.5% of the total number of data points.**



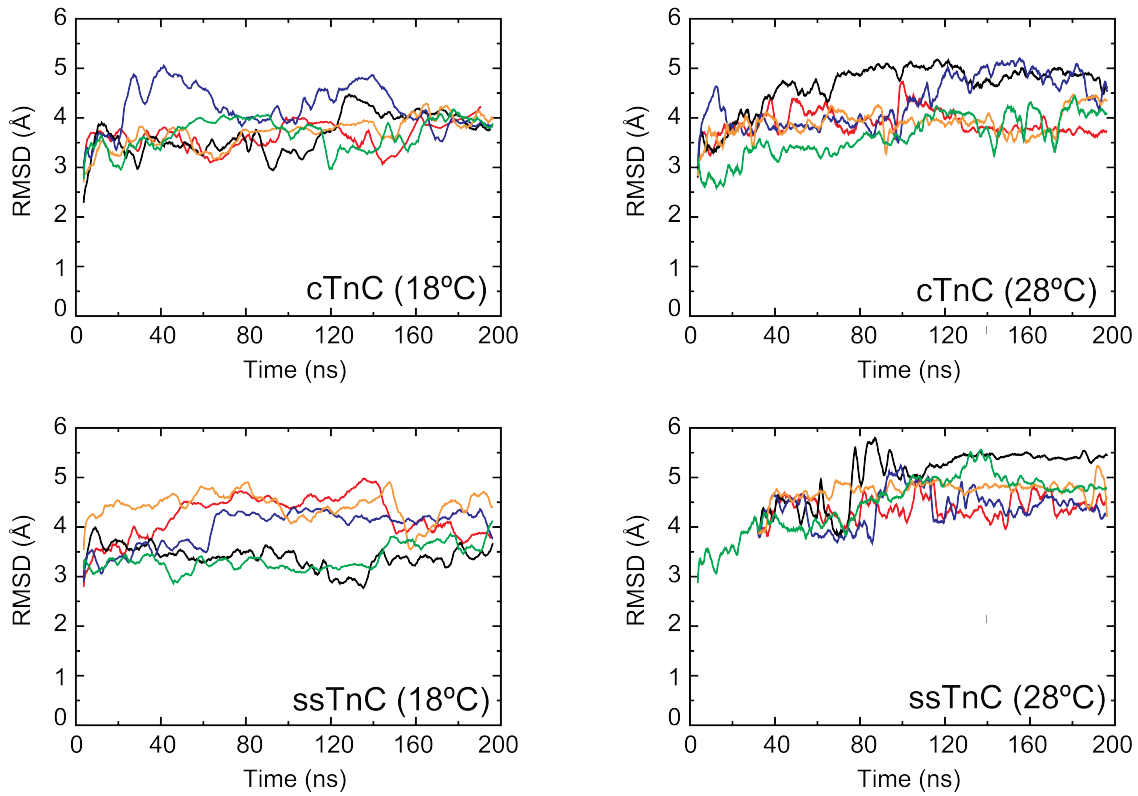

**Figure S2. RMSD as a function of time for 200 ns simulations of  $TnI_{sw}+TnC+Ca^{2+}$  for each temperature paralog combination. These indicate that each of the simulations has diverged substantially from the starting coordinates. Plots are a running average over 0.5% of the total number of data points.**

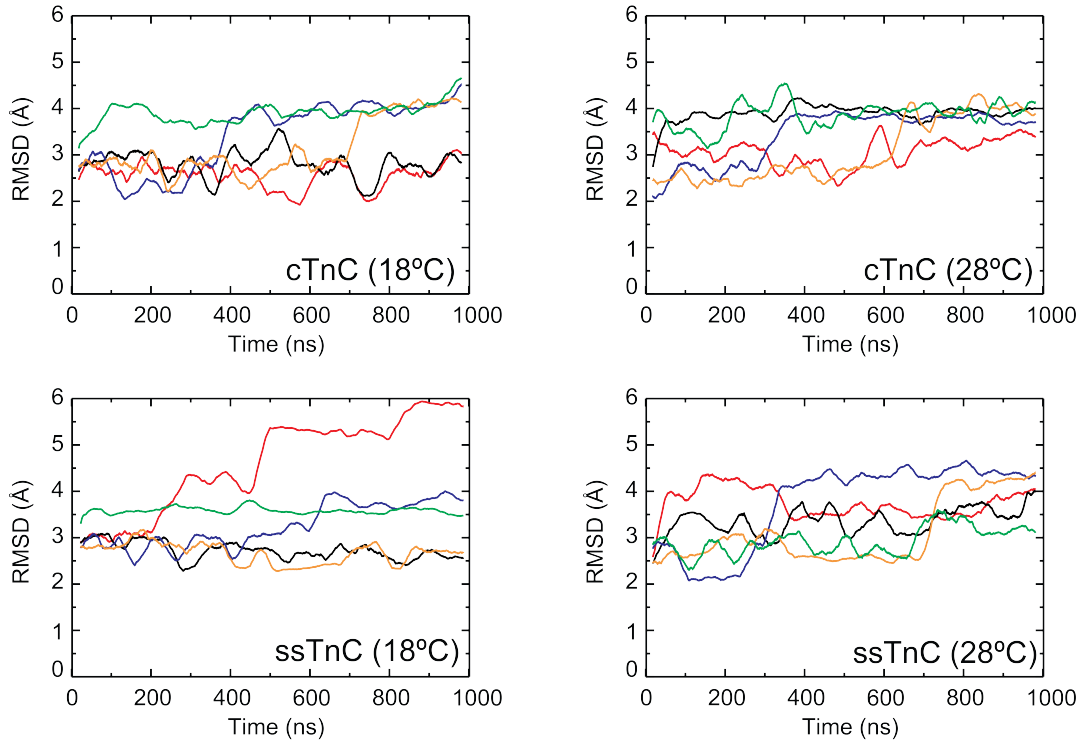

**Figure S3. RMSD as a function of time for 1  $\mu$ s simulations of TnC+Ca<sup>2+</sup> for each temperature paralog combination. These indicate that each of the simulations has diverged substantially from the starting coordinates. Plots are a running average over 0.5% of the total number of data points.**

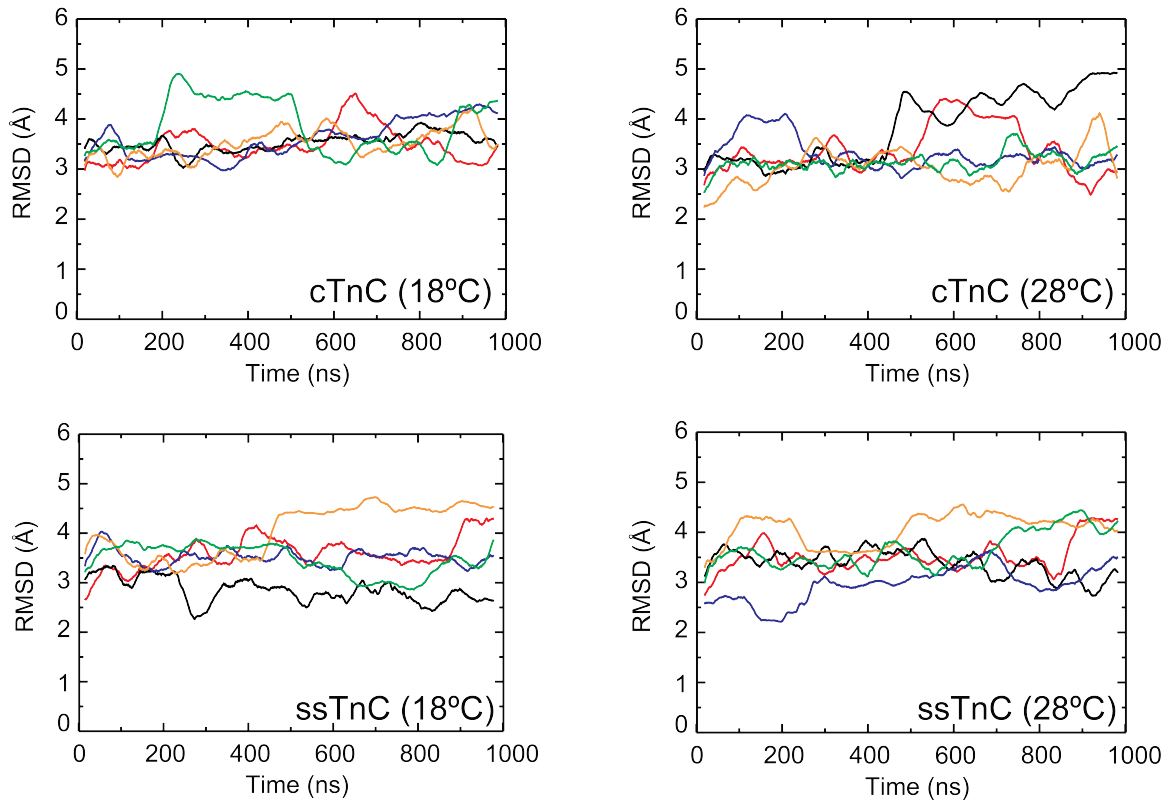

**Figure S4. RMSD as a function of time for 1  $\mu$ s simulations of TnC in the absence of  $\text{Ca}^{2+}$  for each temperature paralog combination. These indicate that each of the simulations has diverged substantially from the starting coordinates. Plots are a running average over 0.5% of the total number of data points.**

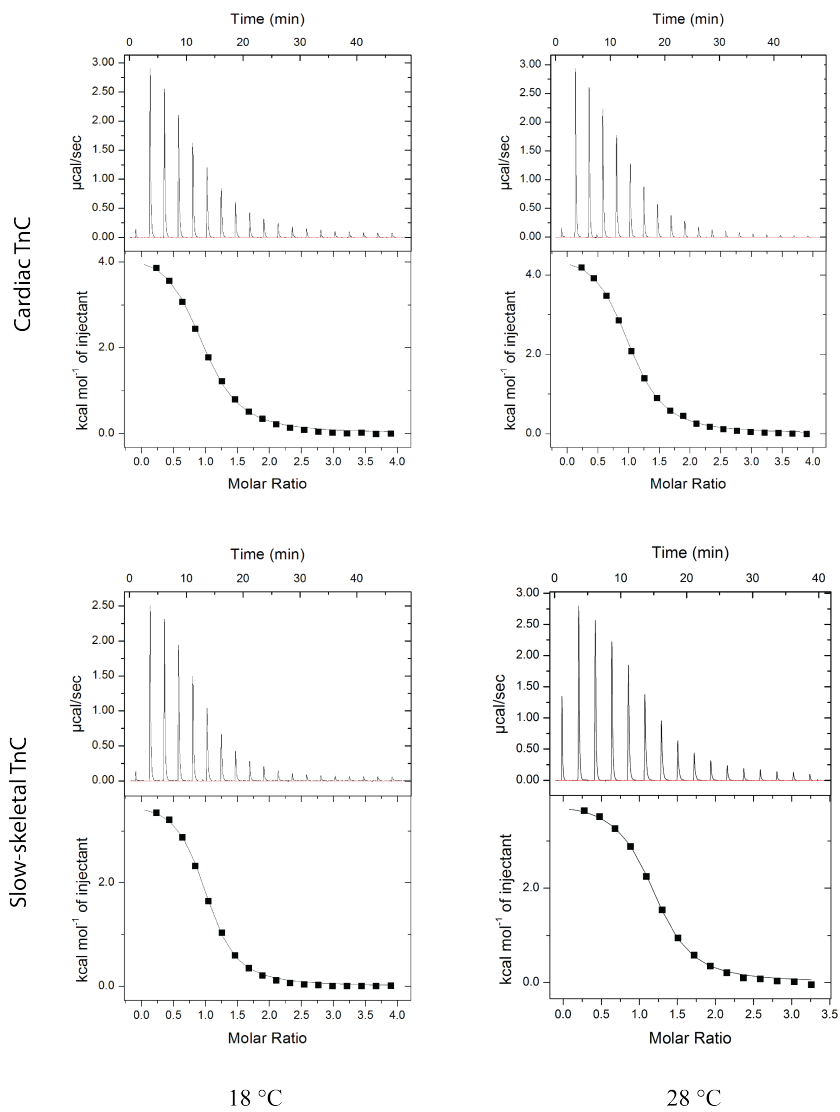

**Figure S5. Representative ITC binding isotherms show the interaction between N-TnC and  $\text{Ca}^{2+}$  for each TnC paralog at each temperature. Thermodynamic parameters and  $K_d$  values are listed in Table 4.**
