# Supplementary material
Source: PubMed Central journal article supplement (PMC4944662)
Supplement: mmc2.pdf [file mmc2.pdf]

# Characterization of Zebrafish Cardiac and Slow Skeletal Troponin C Paralogs by MD Simulation and ITC

Charles M. Stevens,<sup>1,2</sup> Kaveh Rayani,<sup>2</sup> Christine E. Genge,<sup>2</sup> Gurpreet Singh,<sup>4</sup> Bo Liang,<sup>2</sup> Janine M. Roller,<sup>2</sup> Cindy Li,<sup>1</sup> Alison Yueh Li,<sup>2</sup> D. Peter Tieleman,<sup>4</sup> Filip van Petegem,<sup>5</sup> and Glen F. Tibbits<sup>1,2,3,\*</sup>

<sup>1</sup>Department of Molecular Biology and Biochemistry, <sup>2</sup>Department of Biomedical Physiology and Kinesiology, and <sup>3</sup>Department of Biological Sciences, Simon Fraser University, Burnaby, British Columbia, Canada; <sup>4</sup>Biocomputing Group, University of Calgary, Calgary, Alberta, Canada; and <sup>5</sup>Department of Biochemistry, University of British Columbia, Vancouver, British Columbia, Canada

**ABSTRACT** Zebrafish, as a model for teleost fish, have two paralogous troponin C (TnC) genes that are expressed in the heart differentially in response to temperature acclimation. Upon  $\text{Ca}^{2+}$  binding, TnC changes conformation and exposes a hydrophobic patch that interacts with troponin I and initiates cardiac muscle contraction. Teleost-specific TnC paralogs have not yet been functionally characterized. In this study we have modeled the structures of the paralogs using molecular dynamics simulations at 18°C and 28°C and calculated the different  $\text{Ca}^{2+}$ -binding properties between the teleost cardiac (cTnC or TnC1a) and slow-skeletal (ssTnC or TnC1b) paralogs through potential-of-mean-force calculations. These values are compared with thermodynamic binding properties obtained through isothermal titration calorimetry (ITC). The modeled structures of each of the paralogs are similar at each temperature, with the exception of helix C, which flanks the  $\text{Ca}^{2+}$  binding site; this region is also home to paralog-specific sequence substitutions that we predict have an influence on protein function. The short timescale of the potential-of-mean-force calculation precludes the inclusion of the conformational change on the  $\Delta G$  of  $\text{Ca}^{2+}$  interaction, whereas the ITC analysis includes the  $\text{Ca}^{2+}$  binding and conformational change of the TnC molecule. ITC analysis has revealed that ssTnC has higher  $\text{Ca}^{2+}$  affinity than cTnC for  $\text{Ca}^{2+}$  overall, whereas each of the paralogs has increased affinity at 28°C compared to 18°C. Microsecond-timescale simulations have calculated that the cTnC paralog transitions from the closed to the open state more readily than the ssTnC paralog, an unfavorable transition that would decrease the ITC-derived  $\text{Ca}^{2+}$  affinity while simultaneously increasing the  $\text{Ca}^{2+}$  sensitivity of the myofilament. We propose that the preferential expression of cTnC at lower temperatures increases myofilament  $\text{Ca}^{2+}$  sensitivity by this mechanism, despite the lower  $\text{Ca}^{2+}$  affinity that we have measured by ITC.

## INTRODUCTION

Ectothermic species tolerate a range of acute and seasonal temperatures through plasticity in protein function and changes in gene expression (1,2). Central to this tolerance is the maintenance of cardiac function across a range of temperatures. The optimal temperature for ectothermic zebrafish (*Danio rerio*) lies between 25°C and 28°C (3); however, *D. rerio* cardiac function must be maintained through daily seasonal and geographic temperature fluctuations between 6°C and 38°C (3). Many species of fish, including *D. rerio*, increase their heart rate up to twofold per 10° increase in temperature in response to acute temperature fluctuations (4–11). The adaptation to acute temperature

changes occurs more quickly than transcriptional changes can account for. Long-term temperature acclimation confers greater tolerance through altered composition of the cardiomyocyte transcriptome, which includes critical proteins of the contractile apparatus such as members of the troponin complex (1,12).

The cardiac troponin (cTn) complex contains three proteins: cardiac troponin C (cTnC), a  $\text{Ca}^{2+}$  sensor protein; cardiac troponin I (cTnI), an inhibitory protein; and cardiac troponin T (cTnT), which tethers the complex to the remainder of the thin filament by interacting with tropomyosin (13). cTnC is a two-domain protein with four EF-hand motifs designated as sites I through IV. Site I does not bind  $\text{Ca}^{2+}$ , site II is responsible for the  $\text{Ca}^{2+}$ -sensing function of cTnC, and sites III and IV have a structural role and always bind  $\text{Ca}^{2+}$  or  $\text{Mg}^{2+}$  under physiological conditions (14). The bulk-phase cytosolic  $\text{Ca}^{2+}$  concentration increases

Submitted March 7, 2016, and accepted for publication May 19, 2016.

\*Correspondence: [tibbits@sfu.ca](mailto:tibbits@sfu.ca)

Editor: David Sept.

<http://dx.doi.org/10.1016/j.bpj.2016.05.029>

© 2016 Biophysical Society.

from ~100 nM during diastole to a maximum of 1  $\mu$ M in systole (15). As the cytosolic  $\text{Ca}^{2+}$  concentration increases, the regulatory site II of cTnC is bound by  $\text{Ca}^{2+}$ , which leads to a conformational change that exposes a hydrophobic patch. This hydrophobic patch then interacts with cTnI and allows the cTnI inhibitory peptide to withdraw from the actin filament (13). The cTnC- $\text{Ca}^{2+}$  binding interaction also interrupts the cTnT-tropomyosin interaction, permits actin/myosin cross-bridge formation, and initiates muscle contraction.

Several structures have been solved for the cTnC protein, including the N-terminal domain of human cTnC in the  $\text{Ca}^{2+}$ -bound (PDB: 1AP4) and  $\text{Ca}^{2+}$ -free (PDB: 1SPY) (16) forms, and in complex with the cTnI switch peptide (PDB: 1MXL) (17), with TnI (PDB: 1J1D), and with TnT (PDB: 1J1E) (18). The N-terminal domain of trout cTnC has also been solved at 7°C (1R6P) and 30°C (PDB: 1R2U) (19). Under similar conditions, these structures differ minimally. The addition of  $\text{Ca}^{2+}$  causes a slight change in the cTnC structure, although the angle between helices A and B and the status of the hydrophobic patch are unchanged (16). The trout cTnC at 7°C closely resembles mammalian cTnC at 30°C, which suggests a common structure at their respective physiological temperatures (19).

The cardiac contractile element is less sensitive to  $\text{Ca}^{2+}$  at lower temperatures, an effect that is not observed in skeletal muscle (20,21). This desensitizing effect was rescued in mammalian cardiomyocytes by introducing four fish-TnC specific amino acid substitutions, Asn2, Ile28, Gln29, and Asp30 (NIQD) (22). The increased sensitivity was attributed to an allosteric effect on the ability of site II of cTnC to bind  $\text{Ca}^{2+}$  (19), which allows a lower cytosolic  $\text{Ca}^{2+}$  concentration to trigger cardiac contraction at lower temperatures. A structural explanation was elusive, as there were no obvious differences between the human cTnC structure and that with the NIQD substitutions introduced (23). Because these residues are in the N-helix and hydrophobic patch of cTnC, regions that interact with the other members of the cTn complex (18), the NIQD substitutions may stabilize the  $\text{Ca}^{2+}$ -bound, open conformation of cTnC in the complex.

The fish contractile element adjusts to temperature change in part through the differential expression of a slow-skeletal TnC (ssTnC or TnC1b) variant (1,24). The slow-skeletal paralog differs from the cardiac paralog (cTnC or TnC1a) at 18 out of 161 amino acid positions. Interestingly, the ssTnC paralog is missing one of the four NIQD residues, where asparagine 2 is replaced by aspartic acid, which is found at that position in mammals (1). The ssTnC paralog in *D. rerio* is the result of a tandem gene duplication event. Although many redundant duplicate genes are lost, in some cases the ancestral gene function is divided between the duplicates. This process, referred to as subfunctionalization (25), results in the retention of functional paralogs in the genome (26).

The ability of ssTnC to rescue cardiac contraction in a cTnC knockout in *D. rerio* embryos indicates that the

*D. rerio* TnC paralogs have some overlap in function (24). When *D. rerio* are acclimated to 18°C, cTnC is expressed preferentially in both chambers of the heart, whereas after 28°C acclimation, the ssTnC is upregulated and becomes the dominantly expressed form in the atrium. ssTnC expression in the ventricle is also increased after 28°C acclimation, but does not supersede cTnC expression (1). The differential expression of TnC paralogs is consistent with a temperature-dependent functional difference.

In this study, we report the thermodynamic properties of the interaction between  $\text{Ca}^{2+}$  and *D. rerio* cTnC and that between  $\text{Ca}^{2+}$  and *D. rerio* ssTnC at 18°C and 28°C. The TnC- $\text{Ca}^{2+}$  interaction was found to be endothermic and entropy driven, similar to the case for human cTnC (27). The ssTnC- $\text{Ca}^{2+}$  interaction, measured by isothermal titration calorimetry (ITC), is stronger at both temperatures, despite very limited structural deviation between the simulation-based structural models. Potential-of-mean-force (PMF) calculations, which do not sample the conformational change, yield similar  $\Delta G$  values for the two paralogs at 28°C and a lower  $\Delta G$  for ssTnC at 18°C. This discrepancy is resolved through the use of long ( $\mu$ s)-timescale simulations, during which the cTnC protein more readily transitions from the closed to the open state, an unfavorable process that produces lower  $\text{Ca}^{2+}$  affinity as measured by ITC. We propose that the temperature-dependent change in myofilament  $\text{Ca}^{2+}$  sensitivity that is expected as a function of paralog selection is dictated by the favorability of the TnC conformational change, which transduces the  $\text{Ca}^{2+}$  binding signal to the myofilament, rather than the affinity of the regulatory domain of TnC for  $\text{Ca}^{2+}$ .

## MATERIALS AND METHODS

### Homology modeling and equilibrium molecular dynamics simulations

The initial models for the TnC constructs were generated using the Swiss-model Workspace (28). These models used the NMR-derived  $\text{Ca}^{2+}$ -bound or  $\text{Ca}^{2+}$ -free N-terminal domain of the human cTnC structure (PDB:1AP4 or PDB: 1SPY, respectively) as a template. Models were built for the N-terminal domain of the cardiac and slow-skeletal paralogs of TnC.

The resulting models were equilibrated with GROMACS 4.6.5 (29), using the AMBER99-sb-ILDN (30) force field. The simulation system was defined as a periodic “cubic” box and was prepared as described in Table S1 in the Supporting Material using the TIP3P water model (31). This was followed by steepest-descent energy minimization to a tolerance of 10 kJ mol<sup>-1</sup> nm<sup>-1</sup> and conjugate gradient energy minimization for 10,000 steps. The minimized system was restrained with 1000 kJ mol<sup>-1</sup> nm<sup>-1</sup> absolute position restraints on all of the nonsolvent atoms and equilibrated for 1 ns. The restrained simulations were held at 28°C or 18°C using V-rescale temperature coupling (32) and isotropic Berendsen pressure coupling (33) with a  $\tau_T$  of 0.1 and  $\tau_P$  of 1.0, respectively. Interactions were calculated using PME electrostatics (34) and the Verlet cut-off scheme (35). Bond lengths were constrained using the LINCS algorithm (36). Production simulations were done in five replicated 100 ns NPT simulations with no position restraints; other parameters were carried forward from the position-restrained simulations. Long-timescale simulations were identical, with the exception that the run time was extended to 1  $\mu$ s and snapshots

were saved every 100 ps. Simulations of the open conformation of the TnC molecule were stabilized in the open conformation by the presence of the TnI<sub>SW</sub> peptide, as described in Genge et al. (37).

The final models were produced by clustering with the Daura algorithm (38) over the backbone and C $\beta$  atoms of each structure across the five trajectory replicates of each paralog-temperature combination; the middle structure of each of the largest clusters from each mutant simulation was used for further analysis. Protein structure superimpositions were performed with VMD (39), and structural quality assessments were carried out using RAMPAGE (40), QMEAN (41), WHATCHECK (42), and MOLPROBITY (43). Quality statistics may be found in Tables S1–S4. Interhelical angles were measured using interhlx (44) over each replicated simulation. Similarly, the hydrophobic solvent-accessible surface areas (h-sasa) of the TnC molecules were calculated with *g\_sas* over each simulation and averaged (45). The TnI<sub>SW</sub> was excluded from the complex simulations for the h-sasa calculations of TnC in the open conformation. The number of hydrogen bonds in TnC was calculated with *g\_hbond*, which uses a cutoff radius of 3.5 Å and a 30° angle to enumerate donor/acceptor pairs; these values were averaged over each simulation.

## Free-energy calculations

The Ca<sup>2+</sup>-bound TnC model was placed in a “cubic” box with dimensions 6 nm × 6 nm × 15 nm, solvated, and neutralized as in Table S1. This was followed by steepest-descent energy minimization to a tolerance of 10 kJ mol<sup>-1</sup> nm<sup>-1</sup> and conjugate gradient energy minimization for 1000 steps. The minimized system was restrained with 1000 kJ mol<sup>-1</sup> nm<sup>-1</sup> absolute position restraints on all of the nonsolvent atoms and equilibrated for 1 ns.

The initial conformations for umbrella sampling were generated as follows: protein  $\alpha$ -helical C $\alpha$  atoms were restrained in three dimensions with a potential with a force constant of 1000 kJ mol<sup>-1</sup> nm<sup>-1</sup>, and the site II Ca<sup>2+</sup> were restrained only in the *y* and *z* dimensions to permit the movement of the ion. A constraint pulling force was applied in the *x* dimension at 0.001 nm ps<sup>-1</sup>. Windows for umbrella sampling were extracted from the resulting trajectory at distance intervals of 0.5 Å between 0 and 1 nm, every 1 Å between 1 nm and 2 nm, and every 2 Å between 2 nm and 5 nm.

## Umbrella sampling and the weighted-histogram analysis method

Umbrella simulations were run as above, with no restraining potentials aside from the umbrella potential between the Ca<sup>2+</sup> ion and the center of mass of the  $\alpha$ -carbons of the TnC molecule. These simulations used the same parameters as the pull simulations, with the pull rate set to 0, and were run for 30 ns. Analysis was performed using *g\_wham* (46) and the first 5 ns of each sampling window simulation were discarded; errors were estimated with 10,000 bootstraps of the weighted-histogram analysis method of calculation.

## Protein expression and purification

Synthetic codon-optimized genes (GeneArt, Regensburg, Germany) encoding full-length *D. rerio* cTnC (gi 28822163) and ssTnC (gi 50344824) were cloned into the pET-21a(+) expression vector (Novagen, Madison, WI), and the codon corresponding to residue 90 was replaced with a stop codon using the Phusion site-directed mutagenesis protocol (Thermo Scientific, Waltham, MA) to generate N-TnC constructs. The resulting constructs were verified by DNA sequencing and transformed into the *Escherichia coli* BL21(DE3) expression host strain.

Overnight cultures were diluted 20-fold into lysogeny broth and incubated at 37°C with shaking at 250 rpm. Cultures were induced at OD<sub>600</sub> = 0.8 with a final concentration of 1 mM isopropyl  $\beta$ -D-1-thiogalactopyranoside followed by 3 h of growth. Cells were harvested by centrifugation, resuspended

in 20 mL of 50 mM Tris-HCl pH 8.0, 5 mM EDTA, 1 mM phenylmethylsulfonyl fluoride, and one “cOmplete” protease inhibitor tablet (Roche, Basel, Switzerland). The cells were lysed by sonication on ice at 80% amplitude using ten 30 s pulses at 30 s intervals. Lysate was clarified by centrifugation at 30,000 × *g* for 30 min and the supernatant was applied to a fast-flow diethylaminoethyl cellulose column (GE Healthcare, Little Chalfont, UK) equilibrated with 50 mM Tris-HCl, pH 8.0, 5 mM EDTA, and 1 mM dithiothreitol and eluted with a 180 mL gradient between the equilibration buffer and the high-salt buffer comprised of equilibration buffer and 0.55 M NaCl. Fractions containing the TnC protein were pooled and concentrated to 5 mL using an Amicon centrifugal concentrator with a MWCO of 3,000 Da (Millipore, Billerica, MA). The concentrated protein was applied to a HiPrep 26/60 Sephacryl S-100 column (GE Healthcare) equilibrated with 50 mM Tris-HCl pH 8.0, 100 mM NaCl, and 1 mM dithiothreitol. Fractions containing the TnC protein were pooled, concentrated, and stored at -80°C.

## Melting-point determination

Protein solutions in the apo state were dialyzed four times against 2 L of MT buffer (150 mM KCl, 10 mM HEPES, pH 7.5, 3 mM MgCl<sub>2</sub>, and 2 mM EGTA). Ca<sup>2+</sup>-saturated TnC was dialyzed and diluted similarly with MT buffer supplemented with 3 mM of CaCl<sub>2</sub>.

Each melting-temperature replicate contained 3 mg·mL<sup>-1</sup> of TnC and 2.5  $\mu$ L of 100× diluted sypro orange. Temperatures were increased from 4°C to 95°C at 5-s intervals on a CFX96 Touch Real-Time PCR System (BioRad, Hercules, CA). The melting temperature of the protein was determined at the minimum of the first derivative curve, which represents the midpoint of the unfolding transition.

## Isothermal titration calorimetry

Protein solutions were dialyzed three times against 2 L of ITC buffer (50 mM HEPES, pH 7.2, and 150 mM KCl) and diluted to a final concentration of 200  $\mu$ M. Buffers were supplemented with 15 mM, 15 mM, and 2 mM, respectively, of  $\beta$ -mercaptoethanol. Initial buffer contained 2 mM EDTA to generate TnC in the apo state with two subsequent exchanges to remove the EDTA. Concentration was determined using an extinction coefficient of 1490 M<sup>-1</sup> cm<sup>-1</sup> and a molecular mass of 10.1 kDa. The Ca<sup>2+</sup> solution was prepared in the dialysis buffer from the final exchange to a final Ca<sup>2+</sup> concentration of 4 mM. Ca<sup>2+</sup> was titrated into the protein solution in a series of 19 injections of 2  $\mu$ L (the first being a dummy injection of 0.4  $\mu$ L), 2 min apart, with a stirring speed of 1000 rpm. These experiments were repeated at 18°C and 28°C. The heat of dilution of Ca<sup>2+</sup> into buffer was estimated by averaging three data points after the protein was saturated with Ca<sup>2+</sup>. The average of these three points was subtracted then from the Ca<sup>2+</sup>-protein titration curve. Data were analyzed with Origin 8.0 (OriginLab, Northampton, MA).

## RESULTS

### Homology models

After 100 ns of simulation, each of the modeled systems had diverged from the starting coordinates (Figs. S1–S4). The middle structure of the largest cluster for each paralog at each temperature was selected as representative for further analysis. The quality indicators for the representative structures used in the PMF calculations may be found in Tables S2–S5.

The structures of the equilibrated homology models are very similar to each other, except in their length and orientation of helix C (Fig. 1). Helix C immediately follows the

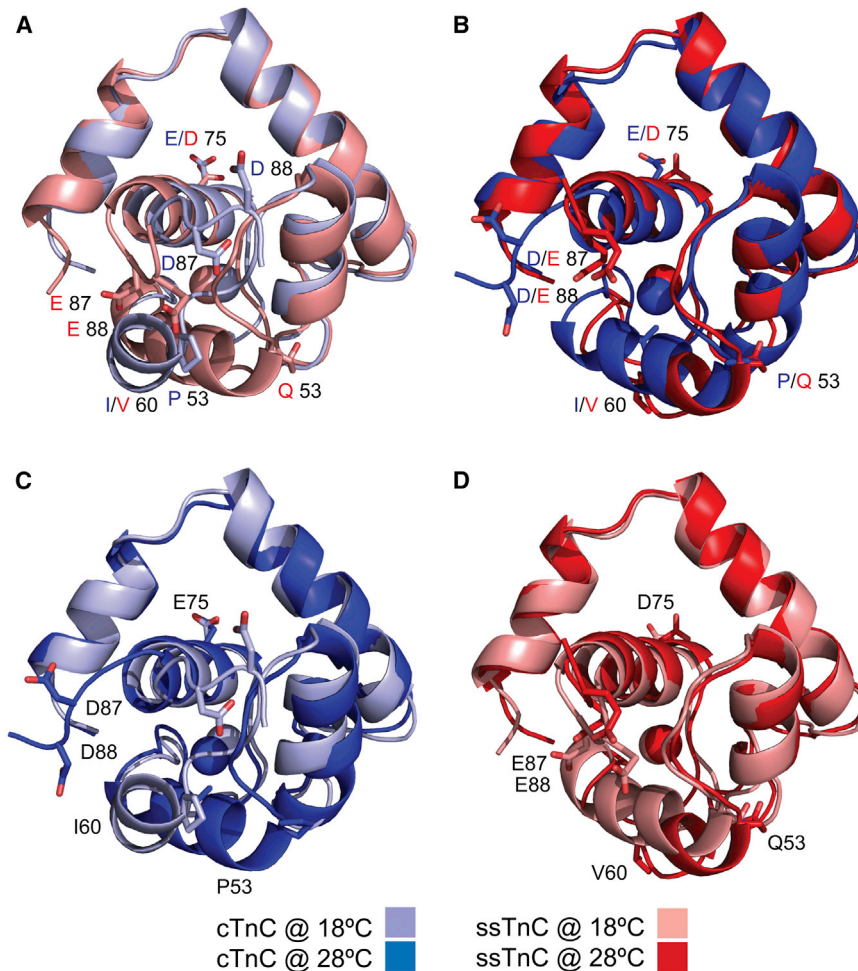

FIGURE 1 Superimposed structures of the equilibrated representative structures after Daura clustering using backbone and  $\beta$ -carbon atoms during 100-ns equilibration trajectories. Residues that differ between paralogs are labeled. (A) cTnC (light blue) and ssTnC (salmon) at 18°C. (B) cTnC (blue) and ssTnC (red) at 28°C. (C) cTnC at 18°C (light blue) and 28°C (blue). (D) ssTnC at 18°C (salmon) and 28°C (red). The differences between these structures are minimal, but they are most pronounced in the orientation of helix C relative to the remainder of the protein. To see this figure in color, go online.

$\text{Ca}^{2+}$ -binding site II, and changes in this helix may affect the  $\text{Ca}^{2+}$  interaction. Helix C contains two sequence substitutions between the TnC paralogs: proline 54 in cTnC is replaced with a glutamine in ssTnC, and isoleucine 61 in cTnC is replaced with a valine in ssTnC. The secondary structure is variable between paralog temperature combinations, with helical lengths that vary by up to four residues in the case of helix C (Fig. 2). The difference in orientation of helix C was the greatest between the paralog-temperature combinations. In cTnC at 18°C, helix C is nearly antiparallel to helix D at 153°, whereas in the other representative structures, helices C and D are at angles of 128°, 123°, and 112° for ssTnC at 28°C, ssTnC at 18°C, and cTnC at 28°C, respectively.

AB interhelical angles were monitored over the course of each simulation. None of the structures reached the open state, defined by an AB interhelical angle below 90° (Fig. 3). During the five replicated 1  $\mu\text{s}$  simulations, the TnC structures at 28°C each had several frames in an intermediate state: seven frames were below 105° in the  $\text{Ca}^{2+}$ -free simulations, whereas 359 frames were below 105° in the  $\text{Ca}^{2+}$ -bound simulations (Figs. 4 and 5). There was a single frame that contained a structure of the ssTnC molecule with an AB interhelical angle below 105° (Table S6).

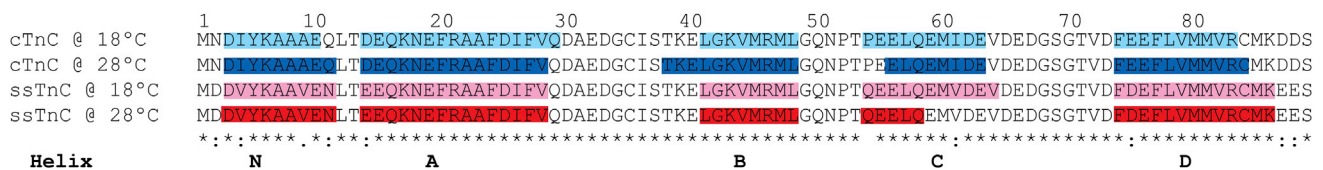

FIGURE 2 Sequence alignment of cTnC and ssTnC, highlighted to visualize the changes in secondary structure after equilibration at each temperature and energy minimization. The most salient change is in helix C, and it is likely due to the temperature-dependent effect of the P55Q, I61V, and E75D substitutions on the stability of helix C and its interaction with helix D. To see this figure in color, go online.

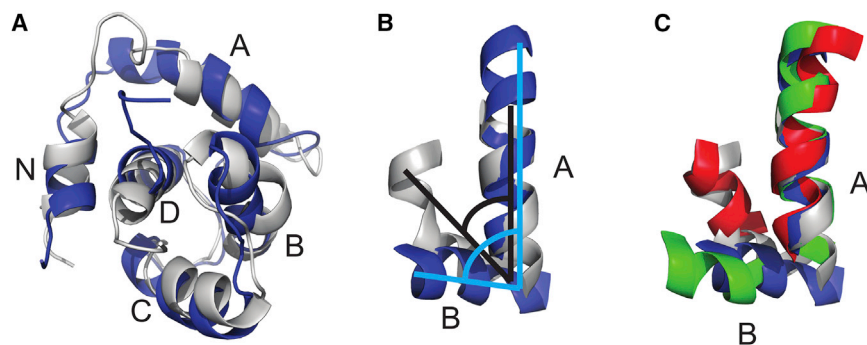

FIGURE 3 (A) Superimposition of snapshots from the 1- $\mu$ s simulation of cTnC at 28°C, with helices labeled N, A, B, C, and D. The most open conformation from this simulation is shown in blue and the most closed conformation is shown in white. (B) Angles are drawn onto the superimposed and isolated A and B helices. (C) The helices are superimposed with equivalent structures from the NMR-derived human cTnC structures in the Ca<sup>2+</sup>-free, closed form (PDB: 1SPY), shown in red, and in the open conformation in complex with the TnI switch peptide (PDB: 1MXL), shown in green. To see this figure in color, go online.

When the h-sasa of each structure at each temperature was calculated, there were only slight differences as a function of temperature or sequence substitution; however when the h-sasa were calculated for either the cardiac or slow-skeletal TnC molecule isolated from the TnC/TnI complex and therefore in the open conformation, the average h-sasa of cTnC at 28°C increased by 4.9 nm<sup>2</sup>, whereas the average h-sasa of ssTnC at 28°C increased by 4.1 nm<sup>2</sup> as a result of the closed-to-open transition. At 18°C, the closed-to-open transition increased the h-sasa by 4.2 nm<sup>2</sup> and 4.6 nm<sup>2</sup> for cTnC and ssTnC, respectively. This is in contrast to the effect of Ca<sup>2+</sup> binding, which had little effect on the average h-sasa of either paralog at each temperature (Table 1).

The flexibility of the paralog-temperature combinations is similar (Fig. 6), as represented by the root mean-square fluctuation (RMSF) of each C $\alpha$  atom sampled over the final

10 ns of each of the simulations and averaged over five replicated simulations. The numbers of hydrogen bonds are identical for the Ca<sup>2+</sup>-free TnC molecules but are increased by ~1 hydrogen bond in each paralog-temperature combination in the Ca<sup>2+</sup>-bound state (Table 2).

The coordination distances for the Ca<sup>2+</sup> ions were measured for each of the side-chain ligand atoms, as well as any nearby potential substitutes (Fig. 7). There was very little difference between paralog-temperature combinations, particularly in the distances between ligand atoms that are involved in coordination of the Ca<sup>2+</sup> ion.

### Free-energy calculations

The change in free energy for each of the paralog temperature combinations was determined using PMF calculations

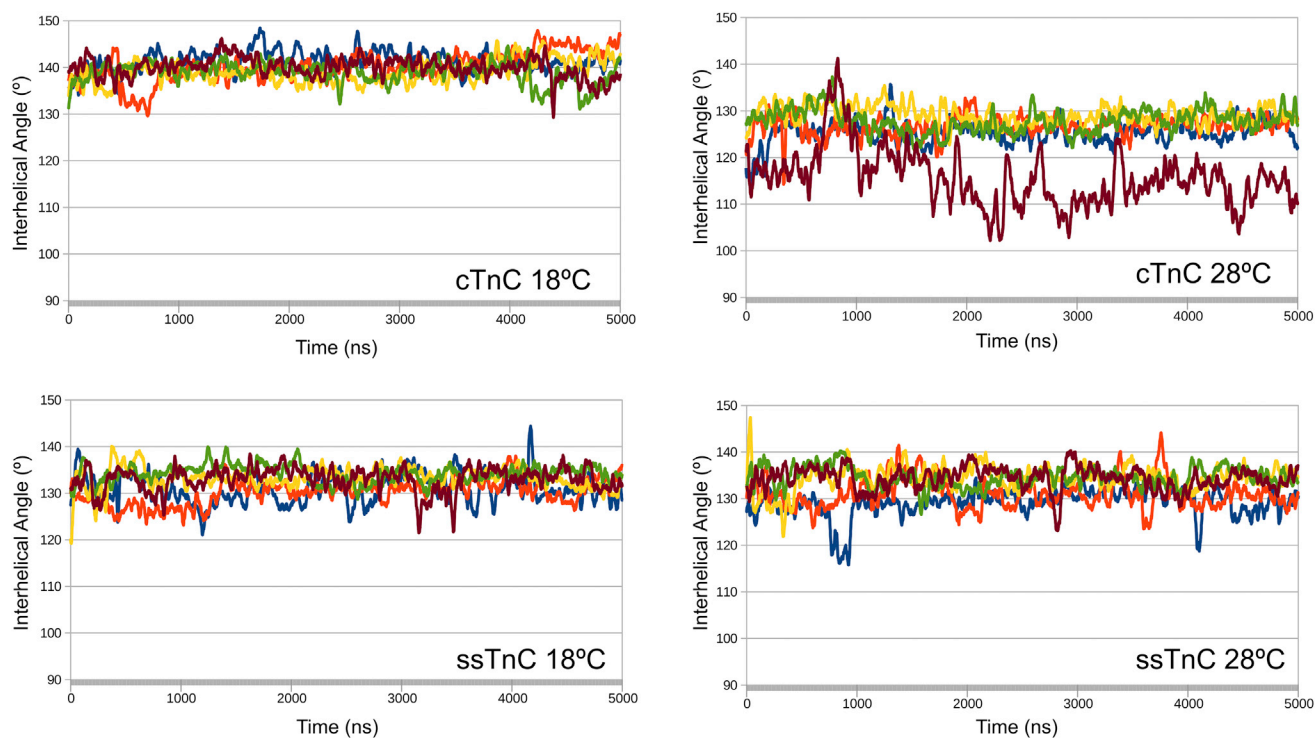

FIGURE 4 The AB interhelical angle over time for 1  $\mu$ s simulations of TnC + Ca<sup>2+</sup> at each temperature, plotted as a 25 ns rolling average. To see this figure in color, go online.

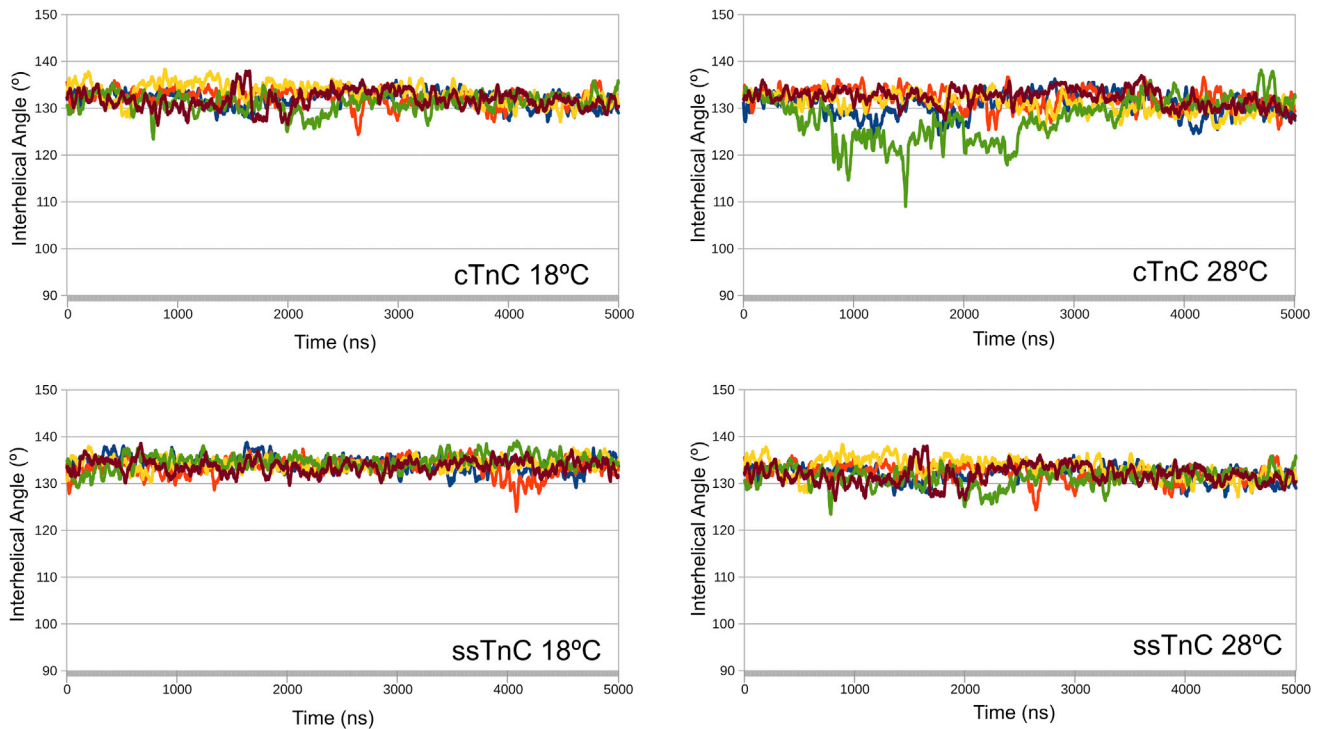

FIGURE 5 The AB interhelical angle over time for 1  $\mu$ s apo-TnC simulations at each temperature, plotted as a 25 ns rolling average. To see this figure in color, go online.

(Fig. 8). The PMF profile is plotted in Fig. 9. The free-energy differences indicate little variance between the paralogs at 28°C ( $-55.5 \pm 4.1$  kJ mol $^{-1}$  and  $-58.0 \pm 2.7$  kJ mol $^{-1}$  for cTnC and ssTnC, respectively), whereas at 18°C, cTnC has a higher  $\Delta G$  of Ca $^{2+}$  interaction than ssTnC ( $-51.4 \pm 3.6$  kJ mol $^{-1}$  vs.  $-45.5 \pm 3.0$  kJ mol $^{-1}$ ).

### Melting-point determination

The melting points ( $T_m$ s) of the Apo-cTnC and Apo-ssTnC were 70.1°C and 65.9°C, respectively. The  $T_m$ s of the Ca $^{2+}$ -bound forms of the proteins were  $\sim 15^\circ\text{C}$  higher in both cases at 84.9°C and 82.3°C for cTnC and ssTnC, respectively.

### ITC

The interactions between TnC and Ca $^{2+}$  were endothermic; in each case, the stoichiometric ratio of Ca $^{2+}$  binding was  $\sim 1$ , indicating that the regulatory site II was exclusively titrated during these experiments. Representative isotherms are available in Fig. S5. The change in entropy ( $\Delta S$ ) was higher for cTnC at 28°C than at 18°C, and

both of these values were greater than the  $\Delta S$  values for ssTnC, which did not differ significantly with temperature. The change in enthalpy ( $\Delta H$ ) values were greatest for the cTnC paralogs: Ca $^{2+}$  binding to cTnC at 28°C yielded a greater  $\Delta H$  in response to increased temperature, whereas the  $\Delta H$  values reported for ssTnC did not differ significantly with temperature. The  $\Delta G$  values were most favorable for ssTnC at 28°C, followed by ssTnC at 18°C and cTnC at 28°C, which did not differ significantly; the  $\Delta G$  value for cTnC at 18°C was the least favorable. The thermodynamic parameters are listed in Table 3. The dissociation constant ( $K_d$ ) value was 2.4  $\mu\text{M}$  higher at 18°C than at 28°C for cTnC, whereas the  $K_d$  value for ssTnC was 1.3  $\mu\text{M}$  higher at 18°C than at 28°C (Fig. 10).

### DISCUSSION

Examination of the effect of sequence substitutions between TnC paralogs on Ca $^{2+}$  interaction has yielded mechanistic insight into the function of TnC. When compared with wild-type human cTnC, the introduction of the fish-specific NIQD molecular phenotype to the human cTnC increases

TABLE 1 Average Hydrophobic Solvent-Accessible Surface Area over the Final 50 ns of Five Replicated 100 ns Simulations

|       | 18°C (Ca $^{2+}$ -Bound) | 28°C (Ca $^{2+}$ -Bound) | 18°C (Ca $^{2+}$ -free) | 28°C (Ca $^{2+}$ free) | 18°C (Open)    | 28°C (Open)    |
|-------|--------------------------|--------------------------|-------------------------|------------------------|----------------|----------------|
| cTnC  | 22.3 $\pm$ 0.4           | 21.8 $\pm$ 0.5           | 22.6 $\pm$ 0.6          | 22.4 $\pm$ 0.7         | 26.5 $\pm$ 0.9 | 26.8 $\pm$ 0.5 |
| ssTnC | 21.0 $\pm$ 0.5           | 20.8 $\pm$ 0.7           | 20.8 $\pm$ 0.8          | 21.5 $\pm$ 0.5         | 25.6 $\pm$ 0.9 | 25.0 $\pm$ 0.8 |

Surface area (nm $^2$ ).

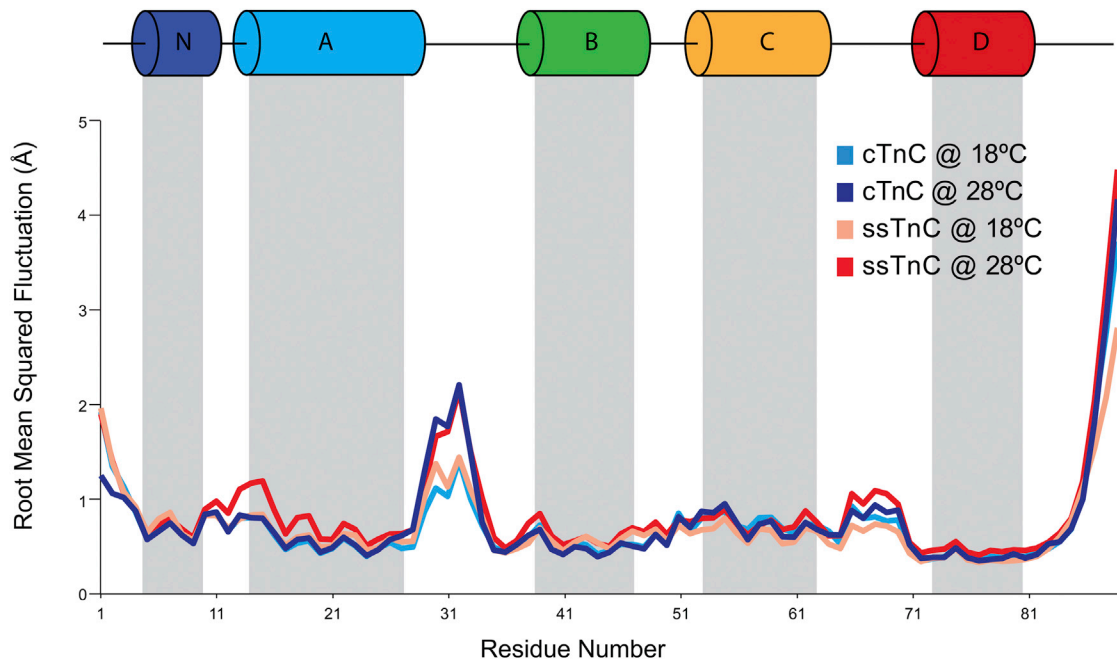

FIGURE 6 Average RMSFs per residue ( $n = 5$ ) are plotted for the final 50 ns of each 100 ns simulations for the paralog-temperature combinations. The protein is most flexible at the termini and EF-hand loops. There is limited variability in RMSFs between paralog-temperature combinations, which suggests that the sequence differences do not greatly influence the protein flexibility. There is a slight effect of temperature on flexibility in the loop regions between helices A and B, as well as in the loop between helices C and D. To see this figure in color, go online.

the  $\text{Ca}^{2+}$  sensitivity of myofilaments (22,47). The explanation for the increase in sensitivity is that these sequence substitutions allosterically influence the affinity of site II for  $\text{Ca}^{2+}$ . MD-based PMF analysis has shown that the  $\text{Ca}^{2+}$ -binding properties are similar for the two paralogs at both temperatures, with the exception of ssTnC at 18°C, which has a lower  $\Delta G$  (Fig. 9). The absolute  $\Delta G$  values from MD simulations are overestimated due to the parameterization of  $\text{Ca}^{2+}$  in the MD force field and the use of nonpolarizable water; however, the reported values are reasonable as a relative measure (48). ITC measurements indicate that ssTnC has higher affinity for  $\text{Ca}^{2+}$  at both temperatures, but cTnC is more sensitive to temperature (Fig. 10).

Increased stability of the protein can be conferred by a stronger hydrophobic core or by antiparallel stacking of helices to mutually stabilize helical dipoles (49). The melting temperatures of cTnC and ssTnC indicate that the relative stability of the apo and  $\text{Ca}^{2+}$ -bound forms are similar, since the melting temperature for each was increased by 15°C as a function of  $\text{Ca}^{2+}$  interaction. Paradoxically, cTnC, which is dominantly expressed at lower temperatures, has a higher melting point than ssTnC despite RMSF values that show

that flexibilities of the paralogs are approximately equal (Fig. 6). The MD simulations predict that there is one additional hydrogen bond on average in the  $\text{Ca}^{2+}$ -bound states compared to the  $\text{Ca}^{2+}$ -free state, but the total numbers of H-bonds were similar between paralogs at each temperature (Table 2). The h-sasa upon  $\text{Ca}^{2+}$  binding decreased for each paralog-temperature combination, with the exception of ssTnC at 18°C, which suggests that any stabilizing effect of  $\text{Ca}^{2+}$  binding was less pronounced in that condition.

The process of  $\text{Ca}^{2+}$  binding to  $\text{Ca}^{2+}$ -sensing EF-hand proteins is a balance between conformational strain and conformational change (49). The strain induced by  $\text{Ca}^{2+}$  binding is released by the unfavorable exposure of the hydrophobic patch (49). A more stable closed conformation relative to the open conformation will increase the energetic cost of the closed-open conformational change and decrease the affinity for  $\text{Ca}^{2+}$ . Changes in secondary structure have been noted in response to  $\text{Ca}^{2+}$  binding of other TnC proteins through the use of CD spectroscopy; greater helical content in the  $\text{Ca}^{2+}$ -bound form conferred greater stability and increased the favorability of the  $\text{Ca}^{2+}$  interaction (50,51). The structural differences between the temperature-paralog

TABLE 2 Average Number of Hydrogen Bonds in Each Structure over the Final 100 ns of Five Replicated 1  $\mu\text{s}$  Simulations for  $\text{Ca}^{2+}$ -Bound and  $\text{Ca}^{2+}$ -free Models of cTnC and ssTnC

|       | 18°C ( $\text{Ca}^{2+}$ -Bound) | 28°C ( $\text{Ca}^{2+}$ -Bound) | 18°C ( $\text{Ca}^{2+}$ -free) | 28°C ( $\text{Ca}^{2+}$ -free) |
|-------|---------------------------------|---------------------------------|--------------------------------|--------------------------------|
| cTnC  | 62.0 $\pm$ 1.6                  | 61.0 $\pm$ 1.3                  | 60.9 $\pm$ 0.6                 | 60.6 $\pm$ 1.0                 |
| ssTnC | 61.8 $\pm$ 0.8                  | 61.3 $\pm$ 1.6                  | 60.9 $\pm$ 1.4                 | 60.6 $\pm$ 1.2                 |

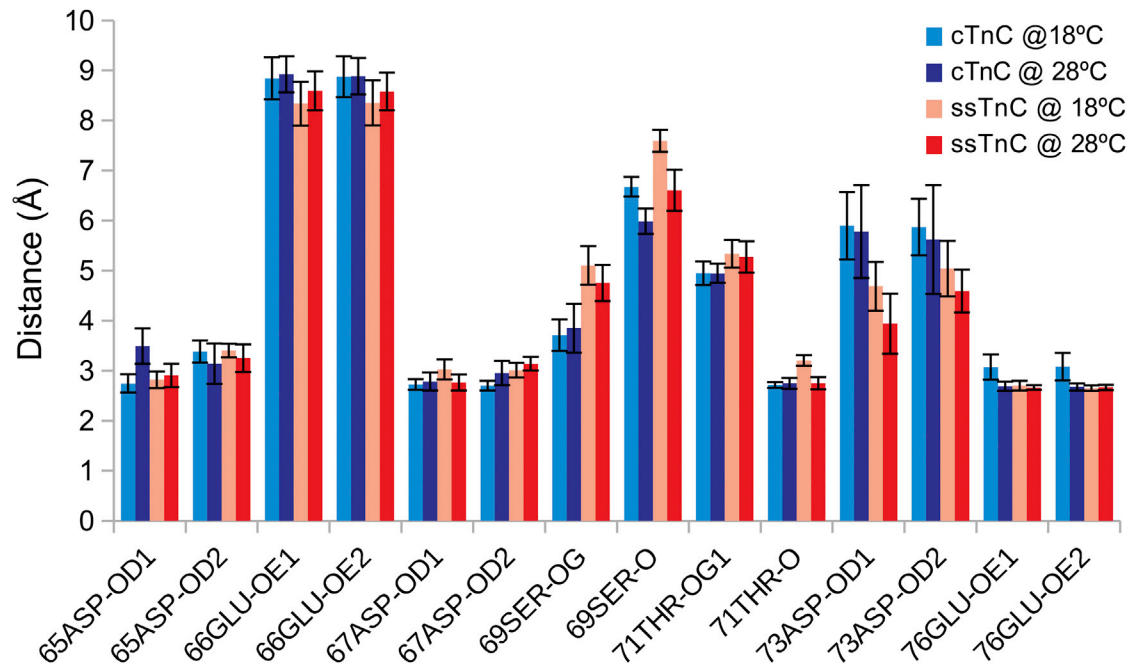

FIGURE 7  $\text{Ca}^{2+}$  coordination distances for each paralog-temperature combination. Residues that may offer substitute ligands are also included. The distances are similar for the two paralogs at both temperatures. Ser69-OG is slightly closer to the  $\text{Ca}^{2+}$  ion in the cTnC simulations, whereas Asp73-OD1 is slightly closer to the  $\text{Ca}^{2+}$  ion in the ssTnC simulations. To see this figure in color, go online.

combinations are primarily found in the length and orientation of helix C, which is adjacent to site II and alters the C/D helical interface (Figs. 1 and 2). This helix is shorter in the representative structure of ssTnC at 28°C than in the others, which suggests that the stability of this helix may be compromised at 28°C while under the conformational strain induced by  $\text{Ca}^{2+}$  binding. Helices C and D contain three sequence substitutions between cTnC and ssTnC. Residues 54, 61, and 75 are proline, isoleucine, and glutamic acid, respectively, in cTnC, which are replaced by glutamine, valine, and aspartic acid, respectively, in ssTnC. The proline-to-glutamine substitution in particular may increase affinity by destabilizing the closed conformation in ssTnC, and relieve the conformational strain through shortening of helix C. In addition, there is evidence that the I61Q substitution in human cTnC can affect the stability of the helical packing at the B/C helical interface (52).

Sequence substitutions that stabilize the open conformation of N-cTnC produce an increase in  $\text{Ca}^{2+}$  sensitivity without altered coordination of  $\text{Ca}^{2+}$  by site II. These substitutions increase the favorability of the conformational change through the release of the  $\text{Ca}^{2+}$ -induced conformational strain on the tertiary structure of the protein, and they minimize the energetic penalty of the conformational change (49,53,54). The TnI switch peptide (TnI<sub>SW</sub>) binds to the hydrophobic cleft and stabilizes the open conformation of TnC while simultaneously occluding the hydrophobic residues (17). In the absence of TnI<sub>SW</sub>, TnC opening and exposure of the hydrophobic patch results in the unfavorable formation of a clathrate water shell. In the cTnC-TnI<sub>SW</sub> system, this shell is replaced by hydrophobic interactions between N-cTnC and TnI<sub>SW</sub> and by interactions between water and the hydrophilic side chains of the solvent-exposed portion of the TnI<sub>SW</sub>. Many fluorescence-based

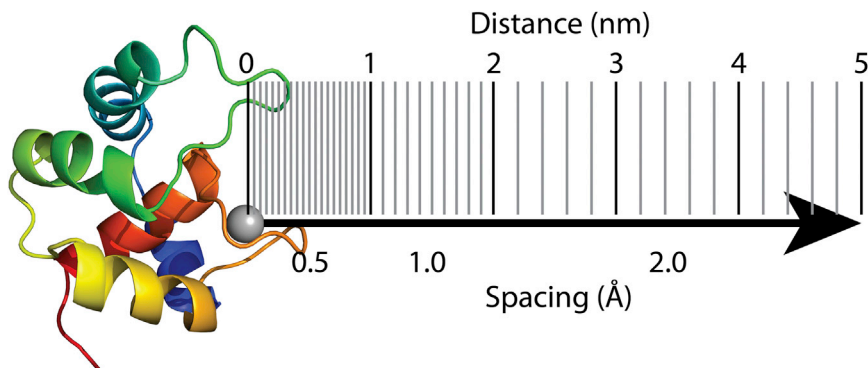

FIGURE 8 PMF reaction coordinate. The  $\text{Ca}^{2+}$  ion is removed from the site II binding loop along the  $x$  axis. Vertical lines indicate the frequency of PMF sampling windows over the reaction coordinate. Sampling windows were arranged at 0.5 Å below 1.0 nm distance, 1 Å between 1.0 and 2.0 nm, and 2 Å between 2.0 and 5.0 nm. To see this figure in color, go online.



## PMF Profile

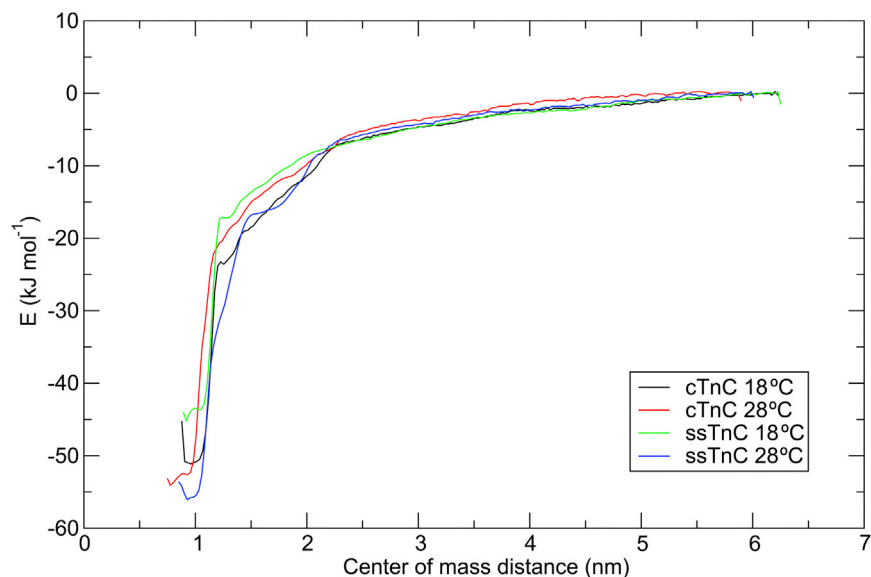

FIGURE 9 WHAM-derived umbrella potentials for each temperature-paralog combination. The plots for the two paralogs appear to overlap at each temperature; however, the values at low center-of-mass distance reach minima at different points. At 28°C, the  $\Delta G$  values of  $\text{Ca}^{2+}$  interaction for cTnC and ssTnC were  $-55.5 \pm 4.1 \text{ kJ mol}^{-1}$  and  $-58.0 \pm 2.7 \text{ kJ mol}^{-1}$ , respectively. At 18°C, the  $\Delta G$  of  $\text{Ca}^{2+}$  interaction was  $-51.4 \pm 3.6 \text{ kJ mol}^{-1}$  for cTnC and  $-45.5 \pm 3.0 \text{ kJ mol}^{-1}$  for ssTnC. To see this figure in color, go online.

measurements have been used to measure TnC  $\text{Ca}^{2+}$  affinity in the presence of the other members of the Tn complex and thin filament (53). However, the use of fluorophores such as IAANS (55,56) or the fluorogenic F27W mutation (57) makes it possible to monitor  $\text{Ca}^{2+}$  binding by responding to the change in hydrophobicity precipitated by the conformational change, and different results are achieved with the addition of other Tn-complex and thin-filament proteins. The absence of the remainder of the Tn complex and its stabilizing effect on the open conformation of TnC thus constitutes a limitation to this work.

In a population of TnC molecules,  $\text{Ca}^{2+}$  binding leads to a shift in the equilibrium between the closed and open states, with the proportion shifting from 0% open in the apo-state to between 20% and 27% open in the  $\text{Ca}^{2+}$ -bound state (58,59). The free-energy cost of this transition has been estimated, through the use of long timescale simulations, at  $8 \text{ kcal mol}^{-1}$  ( $33.5 \text{ kJ mol}^{-1}$ ) for  $\text{Ca}^{2+}$ -bound human wild-type cTnC (60), which is comparable to the energy of conformational changes in other proteins, such as the ligand-binding domain of an ionotropic glutamate receptor (61) and p38 $\alpha$  kinase (62) at  $29 \text{ kJ mol}^{-1}$  and  $50 \text{ kJ mol}^{-1}$ , respectively. The conformational change

can confound ITC measurements, as the energetics of the shift in equilibrium between the open and closed states cannot be decoupled experimentally from the  $\text{Ca}^{2+}$ -binding interaction.

The disparity between the  $\Delta G$  values obtained from ITC and PMF calculations may be attributed to whether the conformational change is included in the measurement. Sequence modifications that affect the relative stability of the closed or open forms, including changes to the size or degree of hydrophobicity of the hydrophobic patch or the packing of the core of the TnC molecule, will influence the affinity of TnC for  $\text{Ca}^{2+}$ . MD-derived  $\Delta G$  values report the affinity of site II as a function of structural differences due to sequence substitution and equilibration at each temperature, but they do not account for the thermodynamic consequences of the open-to-closed conformational change. ITC measurements of the equilibrium energy include the change in proportion of open and closed TnC molecules as a function of  $\text{Ca}^{2+}$  titration. The MD simulations presented here indicate that the  $\Delta G$  of  $\text{Ca}^{2+}$  binding is similar for both paralogs at 28°C, and for cTnC at 18°C, whereas the  $\Delta G$  of  $\text{Ca}^{2+}$  binding for ssTnC at 18°C is less favorable. The timescale of the PMF simulation is inadequate to sample the conformational change of the

TABLE 3 Thermodynamic Parameters Derived from ITC for Each Paralog-Temperature Combination

|                                     | cTnC (18°C)       | cTnC (28°C)       | ssTnC (18°C)      | ssTnC (28°C)      |
|-------------------------------------|-------------------|-------------------|-------------------|-------------------|
| $K_d$ ( $\mu\text{M}$ )             | $19.0 \pm 1.2^A$  | $16.7 \pm 0.8^B$  | $11.5 \pm 0.7^C$  | $10.2 \pm 0.8^D$  |
| $\Delta S$ ( $\text{J mol}^{-1}$ )  | $153.9 \pm 2.1^B$ | $158.6 \pm 5.0^A$ | $147.7 \pm 2.9^C$ | $148.1 \pm 2.1^C$ |
| $\Delta H$ ( $\text{kJ mol}^{-1}$ ) | $18.5 \pm 0.5^B$  | $20.2 \pm 1.4^A$  | $15.4 \pm 0.8^C$  | $15.9 \pm 0.5^C$  |
| $\Delta G$ ( $\text{kJ mol}^{-1}$ ) | $-26.4 \pm 0.2^A$ | $-27.6 \pm 0.1^B$ | $-27.5 \pm 0.1^B$ | $-28.8 \pm 0.2^C$ |

Analysis of variance was used to determine that a significant difference existed between mutant-temperature conditions for all four factors. Tukey's post hoc test was carried out at the level of each factor and is indicated by superscript letters, where mutant-temperature conditions with unique letters are significantly different ( $p < 0.05$ ).  $n = 3$ .

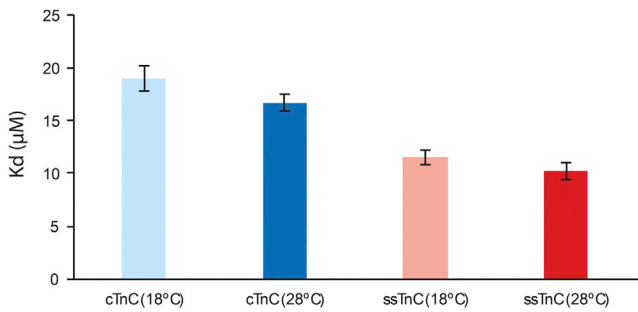

FIGURE 10 Plot of the mean  $K_d$  values  $\pm$  SE. cTnC has a higher  $K_d$  than ssTnC at each temperature, and at each temperature, the  $K_d$  values for each paralog are comparable, though higher at 18°C than at 28°C for each paralog. To see this figure in color, go online.

protein, and therefore, its energetic contribution cannot be included. The  $\Delta G$  values collected by ITC are in the range  $-26.4$  to  $-28.8$   $\text{kJ mol}^{-1}$  (Table 3) and are similar to those reported for human cTnC, with comparable effects of temperature on binding. The free energy of the  $\text{Ca}^{2+}$ -human-cTnC measured at 10°C and 25°C had  $\Delta G$  values of  $-26.6$  and  $-30.5$   $\text{kcal mol}^{-1}$ , respectively (27). The *D. rerio* TnC paralogs are much less temperature sensitive than human cTnC, as demonstrated by a 0.3  $\text{kcal mol}^{-1}$  increase in the  $\Delta G$  of cTnC for  $\text{Ca}^{2+}$  when temperature is increased from 18°C to 28°C, but this effect is not present in ssTnC due to lower values of  $\Delta S$ . The lower  $\Delta H$  values in ssTnC maintain  $\text{Ca}^{2+}$  binding at a similar  $\Delta G$ , despite the reduced magnitude of ssTnC  $\Delta S$ .

In most species, reduced temperature causes a decrease in cardiac myofilament  $\text{Ca}^{2+}$  sensitivity, an effect that is mediated by cTnC (20,63). In ectothermic species, cardiac function must be maintained through acute and seasonal temperature change. The differentially expressed ssTnC protein may play a role in this temperature tolerance. The *D. rerio* ssTnC has higher  $\text{Ca}^{2+}$  affinity at both temperatures, and its expression is increased in warm-acclimated *D. rerio* (1). Our work suggests that the changes in TnC  $\text{Ca}^{2+}$  binding are dictated by three residue substitutions that alter the structure of helices C and D and together modify the energetic landscape of the TnC conformational change, which exposes the hydrophobic patch less frequently in ssTnC than in cTnC. Given that higher relative  $\text{Ca}^{2+}$  sensitivity is required for survival at lower temperatures (9), and that cTnC is dominantly expressed at low temperatures (1), we expect that cTnC should have higher affinity for  $\text{Ca}^{2+}$ . That is not what was found in this study. Monitoring the AB interhelical angle over 1- $\mu\text{s}$  simulations has shown that the  $\text{Ca}^{2+}$ -bound cTnC molecule is more amenable to conformational change than ssTnC. From this, we infer that cTnC has a less stable closed conformation than ssTnC, and is therefore less able to tolerate the conformational strain induced by  $\text{Ca}^{2+}$  binding. cTnC is more likely to transition between the closed and open states, which should create higher myofilament  $\text{Ca}^{2+}$  sensitivity

while also accounting for the lower  $\text{Ca}^{2+}$  affinity we have observed by ITC. In this way, the molecular mechanism that produces higher affinity of the isolated ssTnC molecule for  $\text{Ca}^{2+}$  may contribute to the lower myofilament  $\text{Ca}^{2+}$  sensitivity needed for cardiac function at high temperatures through less frequent exposure of the hydrophobic patch (1,22,47). Based on the ITC and MD-simulation evidence presented here, we propose that the temperature-dependent effect of TnC paralog substitution is influenced by differences in the favorability of the TnC conformational change, which transduces the  $\text{Ca}^{2+}$ -binding signal to the myofilament rather than being directly related to  $\text{Ca}^{2+}$  affinity of the TnC molecule.

## SUPPORTING MATERIAL

Five figures and six tables are available at [http://www.biophysj.org/biophysj/supplemental/S0006-3495\(16\)30354-X](http://www.biophysj.org/biophysj/supplemental/S0006-3495(16)30354-X).

## AUTHOR CONTRIBUTIONS

Preliminary Experiments, B.L., C.L., J.R., and A.Y.L.; Experimental Design, C.M.S., K.R., C.E.G., G.S., and D.P.T.; Data Collection, C.M.S., K.R., and C.E.G.; Data Analysis, C.M.S., K.R., C.E.G., G.S., and D.P.T.; Manuscript Preparation, C.M.S.; Manuscript Review, C.M.S., K.R., C.E.G., A.Y.L., G.S., D.P.T., F.v.P., and G.F.T.

## ACKNOWLEDGMENTS

We are grateful for GROMACS tutorials by Justin Lemkul and <http://alchemy.org>.

This study was supported by grants from the Natural Sciences and Engineering Research Council of Canada to G.F.T. and D.P.T. and from the Canadian Institutes of Health Research to G.F.T. G.F.T. is a Tier I Canada Research Chair and D.P.T. is an Alberta Innovates Health Solutions Scientist and Alberta Innovates Technology Futures Strategic Chair in (Bio) Molecular Simulations. Molecular dynamics simulations were carried out on the Westgrid and Caclul Quebec Complexes, which are under the aegis of Compute Canada.

## REFERENCES

- Genge, C. E., W. S. Davidson, and G. F. Tibbits. 2013. Adult teleost heart expresses two distinct troponin C paralogs: cardiac TnC and a novel and teleost-specific ssTnC in a chamber- and temperature-dependent manner. *Physiol. Genomics*. 45:866–875.
- Somero, G. N., and P. W. Hochachka. 1969. Isoenzymes and short-term temperature compensation in poikilotherms: activation of lactate dehydrogenase isoenzymes by temperature decreases. *Nature*. 223:194–195.
- Spence, R., G. Gerlach, ..., C. Smith. 2008. The behaviour and ecology of the zebrafish, *Danio rerio*. *Biol. Rev. Camb. Philos. Soc.* 83:13–34.
- Little, A. G., and F. Seebacher. 2014. Thyroid hormone regulates cardiac performance during cold acclimation in Zebrafish (*Danio rerio*). *J. Exp. Biol.* 217:718–725.
- Gollock, M. J., S. Currie, ..., A. K. Gamperl. 2006. Cardiovascular and haematological responses of Atlantic cod (*Gadus morhua*) to acute temperature increase. *J. Exp. Biol.* 209:2961–2970.
- Clark, T. D., E. Sandblom, ..., A. P. Farrell. 2008. Circulatory limits to oxygen supply during an acute temperature increase in the Chinook

- salmon (*Oncorhynchus tshawytscha*). *Am. J. Physiol. Regul. Integr. Comp. Physiol.* 295:R1631–R1639.
7. Mendonça, P. C., and A. K. Gamperl. 2010. The effects of acute changes in temperature and oxygen availability on cardiac performance in winter flounder (*Pseudopleuronectes americanus*). *Comp. Biochem. Physiol. A Mol. Integr. Physiol.* 155:245–252.
  8. Tiitu, V., and M. Vornanen. 2002. Regulation of cardiac contractility in a cold stenothermal fish, the burbot *Lota lota* L. *J. Exp. Biol.* 205:1597–1606.
  9. Churcott, C. S., C. D. Moyes, ..., G. F. Tibbits. 1994. Temperature and pH effects on  $\text{Ca}^{2+}$  sensitivity of cardiac myofibrils: a comparison of trout with mammals. *Am. J. Physiol.* 267:R62–R70.
  10. Lee, L., C. E. Genge, ..., G. F. Tibbits. 2016. Functional assessment of cardiac responses of adult zebrafish (*Danio rerio*) to acute and chronic temperature change using high-resolution echocardiography. *PLoS One*. 11:e0145163.
  11. Lin, E., A. Ribeiro, ..., G. F. Tibbits. 2014. Optical mapping of the electrical activity of isolated adult zebrafish hearts: acute effects of temperature. *Am. J. Physiol. Regul. Integr. Comp. Physiol.* 306: R823–R836.
  12. Alderman, S. L., J. M. Klaiman, ..., T. E. Gillis. 2012. Effect of cold acclimation on troponin I isoform expression in striated muscle of rainbow trout. *Am. J. Physiol. Regul. Integr. Comp. Physiol.* 303:R168–R176.
  13. Parmacek, M. S., and R. J. Solaro. 2004. Biology of the troponin complex in cardiac myocytes. *Prog. Cardiovasc. Dis.* 47:159–176.
  14. Potter, J. D., and J. Gergely. 1975. The calcium and magnesium binding sites on troponin and their role in the regulation of myofibrillar adenosine triphosphatase. *J. Biol. Chem.* 250:4628–4633.
  15. Bers, D. M. 2002. Cardiac excitation-contraction coupling. *Nature*. 415:198–205.
  16. Spyrapoulos, L., M. X. Li, ..., B. D. Sykes. 1997. Calcium-induced structural transition in the regulatory domain of human cardiac troponin C. *Biochemistry*. 36:12138–12146.
  17. Li, M. X., L. Spyrapoulos, and B. D. Sykes. 1999. Binding of cardiac troponin-I147-163 induces a structural opening in human cardiac troponin-C. *Biochemistry*. 38:8289–8298.
  18. Takeda, S., A. Yamashita, ..., Y. Maéda. 2003. Structure of the core domain of human cardiac troponin in the  $\text{Ca}^{2+}$ -saturated form. *Nature*. 424:35–41.
  19. Gillis, T. E., C. R. Marshall, ..., G. F. Tibbits. 2000.  $\text{Ca}^{2+}$  binding to cardiac troponin C: effects of temperature and pH on mammalian and salmonid isoforms. *Am. J. Physiol. Regul. Integr. Comp. Physiol.* 279:R1707–R1715.
  20. Harrison, S. M., and D. M. Bers. 1990. Modification of temperature dependence of myofilament  $\text{Ca}$  sensitivity by troponin C replacement. *Am. J. Physiol.* 258:C282–C288.
  21. Harrison, S. M., and D. M. Bers. 1989. Influence of temperature on the calcium sensitivity of the myofilaments of skinned ventricular muscle from the rabbit. *J. Gen. Physiol.* 93:411–428.
  22. Gillis, T. E., C. D. Moyes, and G. F. Tibbits. 2003. Sequence mutations in teleost cardiac troponin C that are permissive of high  $\text{Ca}^{2+}$  affinity of site II. *Am. J. Physiol. Cell Physiol.* 284:C1176–C1184.
  23. Zhang, X. L., G. F. Tibbits, and M. Paetzel. 2013. The structure of cardiac troponin C regulatory domain with bound  $\text{Cd}^{2+}$  reveals a closed conformation and unique ion coordination. *Acta Crystallogr. D Biol. Crystallogr.* 69:722–734.
  24. Sogah, V. M., F. C. Serluca, ..., J. D. Mably. 2010. Distinct troponin C isoform requirements in cardiac and skeletal muscle. *Dev. Dyn.* 239:3115–3123.
  25. Lynch, M., and V. Katju. 2004. The altered evolutionary trajectories of gene duplicates. *Trends Genet.* 20:544–549.
  26. Force, A., M. Lynch, and J. Postlethwait. 1999. Preservation of duplicate genes by subfunctionalization. *Am. Zool.* 39:78A.
  27. Skowronsky, R. A., M. Schroeter, ..., A. M. Spuches. 2013. Thermodynamics and molecular dynamics simulations of calcium binding to the regulatory site of human cardiac troponin C: evidence for communication with the structural calcium binding sites. *J. Biol. Inorg. Chem.* 18:49–58.
  28. Bordoli, L., and T. Schwede. 2012. Automated protein structure modeling with SWISS-MODEL Workspace and the Protein Model Portal. *Methods Mol. Biol.* 857:107–136.
  29. Pronk, S., S. Páll, ..., E. Lindahl. 2013. GROMACS 4.5: a high-throughput and highly parallel open source molecular simulation toolkit. *Bioinformatics*. 29:845–854.
  30. Lindorff-Larsen, K., S. Piana, ..., D. E. Shaw. 2010. Improved side-chain torsion potentials for the Amber ff99SB protein force field. *Proteins*. 78:1950–1958.
  31. Jorgensen, W. L., J. Chandrasekhar, ..., M. L. Klein. 1983. Comparison of simple potential functions for simulating liquid water. *J. Chem. Phys.* 79:926–935.
  32. Bussi, G., D. Donadio, and M. Parrinello. 2007. Canonical sampling through velocity rescaling. *J. Chem. Phys.* 126:014101.
  33. Berendsen, H. J. C., J. P. M. Postma, ..., J. R. Haak. 1984. Molecular-dynamics with coupling to an external bath. *J. Chem. Phys.* 81:3684–3690.
  34. Cerutti, D. S., R. E. Duke, ..., T. P. Lybrand. 2009. Staggered mesh Ewald: an extension of the smooth particle-mesh Ewald method adding great versatility. *J. Chem. Theory Comput.* 5:2322–2338.
  35. Pall, S., and B. Hess. 2013. A flexible algorithm for calculating pair interactions on SIMD architectures. *Comput. Phys. Commun.* 184:2641–2650.
  36. Hess, B., H. Bekker, ..., J. G. E. M. Fraaije. 1997. LINCS: A linear constraint solver for molecular simulations. *J. Comput. Chem.* 18:1463–1472.
  37. Genge, C. E., C. M. Stevens, ..., G. F. Tibbits. 2016. Functional divergence in teleost cardiac troponin paralogs guides variation in the interaction of TnI switch region with TnC. *Genome Biol. Evol.* 8:994–1011.
  38. Daura, X., K. Gademann, ..., A. E. Mark. 1999. Peptide folding: when simulation meets experiment. *Angew. Chem. Int. Ed. Engl.* 38:236–240.
  39. Humphrey, W., A. Dalke, and K. Schulten. 1996. VMD: visual molecular dynamics. *J. Mol. Graph.* 14:33–38, 27–38.
  40. Lovell, S. C., I. W. Davis, ..., D. C. Richardson. 2003. Structure validation by  $\text{C}\alpha$  geometry:  $\phi, \psi$  and  $\text{C}\beta$  deviation. *Proteins*. 50:437–450.
  41. Benkert, P., M. Künzli, and T. Schwede. 2009. QMEAN server for protein model quality estimation. *Nucleic Acids Res.* 37:W510–W514.
  42. Hoof, R. W., G. Vriend, ..., E. E. Abola. 1996. Errors in protein structures. *Nature*. 381:272.
  43. Chen, V. B., W. B. Arendall, 3rd, ..., D. C. Richardson. 2010. MolProbity: all-atom structure validation for macromolecular crystallography. *Acta Crystallogr. D Biol. Crystallogr.* 66:12–21.
  44. Yap, K. L., J. B. Ames, ..., M. Ikura. 2002. Vector geometry mapping. A method to characterize the conformation of helix-loop-helix calcium-binding proteins. *Methods Mol. Biol.* 173:317–324.
  45. Eisenhaber, F., P. Lijnzaad, ..., M. Scharf. 1995. The double cubic lattice method: efficient approaches to numerical integration of surface area and volume and to dot surface contouring of molecular assemblies. *J. Comput. Chem.* 16:273–284.
  46. Hub, J. S., B. L. de Groot, and D. van der Spoel. 2010. g\_wham-A free weighted histogram analysis implementation including robust error and autocorrelation estimates. *J. Chem. Theory Comput.* 6:3713–3720.
  47. Gillis, T. E., B. Liang, ..., G. F. Tibbits. 2005. Increasing mammalian cardiomyocyte contractility with residues identified in trout troponin C. *Physiol. Genomics*. 22:1–7.
  48. Li, H., V. Ngo, ..., S. Y. Noskov. 2015. Representation of ion-protein interactions using the Drude polarizable force-field. *J. Phys. Chem. B*. 119:9401–9416.
  49. Gifford, J. L., M. P. Walsh, and H. J. Vogel. 2007. Structures and metal-ion-binding properties of the  $\text{Ca}^{2+}$ -binding helix-loop-helix EF-hand motifs. *Biochem. J.* 405:199–221.
  50. Parvatiyar, M. S., A. P. Landstrom, ..., J. R. Pinto. 2012. A mutation in TNNC1-encoded cardiac troponin C, TNNC1-A31S, predisposes to

- hypertrophic cardiomyopathy and ventricular fibrillation. *J. Biol. Chem.* 287:31845–31855.
51. Pinto, J. R., M. S. Parvatiyar, ..., J. D. Potter. 2009. A functional and structural study of troponin C mutations related to hypertrophic cardiomyopathy. *J. Biol. Chem.* 284:19090–19100.
  52. Wang, D., M. E. McCully, ..., M. Regnier. 2013. Structural and functional consequences of cardiac troponin C L57Q and I61Q  $\text{Ca}^{2+}$ -desensitizing variants. *Arch. Biochem. Biophys.* 535:68–75.
  53. Li, A. Y., C. M. Stevens, ..., G. F. Tibbits. 2013. Familial hypertrophic cardiomyopathy related cardiac troponin C L29Q mutation alters length-dependent activation and functional effects of phosphomimetic troponin I\*. *PLoS One.* 8:e79363.
  54. Tikunova, S. B., J. A. Rall, and J. P. Davis. 2002. Effect of hydrophobic residue substitutions with glutamine on  $\text{Ca}^{2+}$  binding and exchange with the N-domain of troponin C. *Biochemistry.* 41:6697–6705.
  55. Dong, W. J., C. K. Wang, ..., H. C. Cheung. 1997. Disparate fluorescence properties of 2-[4'-(iodoacetamido)anilino]-naphthalene-6-sulfonic acid attached to Cys-84 and Cys-35 of troponin C in cardiac muscle troponin. *Biophys. J.* 72:850–857.
  56. Hazard, A. L., S. C. Kohout, ..., J. J. Falke. 1998. The kinetic cycle of cardiac troponin C: calcium binding and dissociation at site II trigger slow conformational rearrangements. *Protein Sci.* 7:2451–2459.
  57. Gillis, T. E., T. M. Blumenschein, ..., G. F. Tibbits. 2003. Effect of temperature and the F27W mutation on the  $\text{Ca}^{2+}$  activated structural transition of trout cardiac troponin C. *Biochemistry.* 42:6418–6426.
  58. Cordina, N. M., C. K. Liew, ..., L. J. Brown. 2013. Effects of calcium binding and the hypertrophic cardiomyopathy A8V mutation on the dynamic equilibrium between closed and open conformations of the regulatory N-domain of isolated cardiac troponin C. *Biochemistry.* 52:1950–1962.
  59. McKay, R. T., L. F. Saltibus, ..., B. D. Sykes. 2000. Energetics of the induced structural change in a  $\text{Ca}^{2+}$  regulatory protein:  $\text{Ca}^{2+}$  and troponin I peptide binding to the E41A mutant of the N-domain of skeletal troponin C. *Biochemistry.* 39:12731–12738.
  60. Lindert, S., P. M. Kekenus-Huskey, and J. A. McCammon. 2012. Long-timescale molecular dynamics simulations elucidate the dynamics and kinetics of exposure of the hydrophobic patch in troponin C. *Biophys. J.* 103:1784–1789.
  61. Lau, A. Y., and B. Roux. 2007. The free energy landscapes governing conformational changes in a glutamate receptor ligand-binding domain. *Structure.* 15:1203–1214.
  62. Wang, J., Q. Shao, ..., W. Zhu. 2014. Exploring transition pathway and free-energy profile of large-scale protein conformational change by combining normal mode analysis and umbrella sampling molecular dynamics. *J. Phys. Chem. B.* 118:134–143.
  63. Harrison, S. M., and D. M. Bers. 1990. Temperature dependence of myofilament Ca sensitivity of rat, guinea pig, and frog ventricular muscle. *Am. J. Physiol.* 258:C274–C281.

**Biophysical Journal, Volume 111**

**Supplemental Information**

**Characterization of Zebrafish Cardiac and Slow Skeletal Troponin C Paralogs by MD Simulation and ITC**

**Charles M. Stevens, Kaveh Rayani, Christine E. Genge, Gurpreet Singh, Bo Liang, Janine M. Roller, Cindy Li, Alison Yueh Li, D. Peter Tieleman, Filip van Petegem, and Glen F. Tibbits**

**Table S1. Dimensions, Ions, and water molecules for each simulation system**

|               |                       | 100 ns<br>Ca <sup>2+</sup> -bound | PMF                 | 200 ns<br>TnC+Ca <sup>2+</sup> +Tnl <sub>sw</sub> | 1 $\mu$ s<br>Ca <sup>2+</sup> -free | 1 $\mu$ s<br>Ca <sup>2+</sup> -bound |
|---------------|-----------------------|-----------------------------------|---------------------|---------------------------------------------------|-------------------------------------|--------------------------------------|
| cTnC<br>18°C  | Box Dimensions (nm)   | 5.96 x 5.96 x 5.96                | 14.94 x 5.98 x 5.98 | 7.68 x 7.68 x 7.68                                | 5.96 x 5.96 x 5.96                  | 5.96 x 5.96 x 5.96                   |
|               | K <sup>+</sup> Ions   | 14                                | 14                  | 11                                                | 15                                  | 14                                   |
|               | Cl <sup>-</sup> Ions  | 1                                 | 1                   | 1                                                 | 0                                   | 1                                    |
|               | Ca <sup>2+</sup> Ions | 1                                 | 1                   | 1                                                 | 0                                   | 1                                    |
|               | Water Molecules       | 6612                              | 17349               | 14555                                             | 6655                                | 6612                                 |
| cTnC<br>28°C  | Box Dimensions (nm)   | 5.97 x 5.97 x 5.97                | 14.99 x 5.99 x 5.99 | 7.72 x 7.72 x 7.72                                | 5.98 x 5.98 x 5.98                  | 5.97 x 5.97 x 5.97                   |
|               | K <sup>+</sup> Ions   | 14                                | 13                  | 11                                                | 15                                  | 14                                   |
|               | Cl <sup>-</sup> Ions  | 1                                 | 0                   | 1                                                 | 0                                   | 1                                    |
|               | Ca <sup>2+</sup> Ions | 1                                 | 1                   | 1                                                 | 0                                   | 1                                    |
|               | Water Molecules       | 6612                              | 17352               | 14555                                             | 6655                                | 6612                                 |
| ssTnC<br>18°C | Box Dimensions (nm)   | 5.95 x 5.95 x 5.95                | 14.95 x 5.98 x 5.98 | 7.68 x 7.68 x 7.68                                | 5.97 x 5.97 x 5.97                  | 5.96 x 5.96 x 5.96                   |
|               | K <sup>+</sup> Ions   | 15                                | 14                  | 12                                                | 16                                  | 15                                   |
|               | Cl <sup>-</sup> Ions  | 1                                 | 0                   | 1                                                 | 0                                   | 1                                    |
|               | Ca <sup>2+</sup> Ions | 1                                 | 1                   | 1                                                 | 0                                   | 1                                    |
|               | Water Molecules       | 6612                              | 17343               | 14555                                             | 6657                                | 6612                                 |
| ssTnC<br>28°C | Box Dimensions (nm)   | 5.97 x 5.97 x 5.97                | 15.00 x 6.00 x 6.00 | 7.72 x 7.72 x 7.72                                | 5.98 x 5.98 x 5.98                  | 5.97 x 5.97 x 5.97                   |
|               | K <sup>+</sup> Ions   | 15                                | 14                  | 12                                                | 16                                  | 15                                   |
|               | Cl <sup>-</sup> Ions  | 1                                 | 0                   | 1                                                 | 0                                   | 1                                    |
|               | Ca <sup>2+</sup> Ions | 1                                 | 1                   | 1                                                 | 0                                   | 1                                    |
|               | Water Molecules       | 6612                              | 17340               | 14555                                             | 6657                                | 6612                                 |

Table S2. Homology model quality indicators for representative structures from 100 ns TnC+Ca<sup>2+</sup> simulations.

|                                                      | cTnC (18°C) | cTnC (28°C) | ssTnC (18°C) | ssTnC (28°C) |
|------------------------------------------------------|-------------|-------------|--------------|--------------|
| <b>RAMPAGE</b>                                       |             |             |              |              |
| <b>Favored</b>                                       | 85 (98.84%) | 83 (96.51%) | 84 (97.67%)  | 86 (100.00%) |
| <b>Allowed</b>                                       | 1 (1.16%)   | 3 (3.49%)   | 2 (2.33%)    | 0 (0.00%)    |
| <b>Outlier</b>                                       | 0 (0.00%)   | 0 (0.00%)   | 0 (0.00%)    | 0 (0.00%)    |
| <b>PROCHECK</b>                                      |             |             |              |              |
| <b>Bad Backbone Bonds</b>                            | 0.00%       | 0.00%       | 0.00%        | 0.00%        |
| <b>Bad Backbone Angles</b>                           | 4.60%       | 5.40%       | 4.10%        | 4.60%        |
| <b>Bad Contacts</b>                                  | 0           | 0           | 0            | 0            |
| <b>Molprobrity Score</b>                             | 1.62        | 1.69        | 1.54         | 1.70         |
| <b>QMEAN Score</b>                                   | 0.627       | 0.669       | 0.767        | 0.69         |
| <b>Whatcheck Structure Z-Score</b>                   |             |             |              |              |
| <b>1st Generation Packing</b>                        | -1.836      | -1.079      | -1.237       | -1.322       |
| <b>2n Generation Packing</b>                         | -0.89       | -1.245      | -1.349       | -1.079       |
| <b>χ<sub>1</sub>/χ<sub>2</sub> Rotamer Normality</b> | -1.45       | -1.685      | -2.472       | -1.836       |
| <b>Backbone Conformation</b>                         | 0.672       | 0.93        | 1.177        | 0.662        |
| <b>Inside/Outside</b>                                | 0.955       | 0.966       | 0.926        | 0.999        |
| <b>Whatcheck RMS Z-Score</b>                         |             |             |              |              |
| <b>Bond Lengths</b>                                  | 0.644       | 0.635       | 0.642        | 0.662        |
| <b>Bond Angles</b>                                   | 1.173       | 1.175       | 1.109        | 1.177        |
| <b>Omega Angle Restraints</b>                        | 1.471       | 1.235       | 1.422        | 1.369        |
| <b>Side Chain Planarity</b>                          | 1.886       | 1.732       | 1.488        | 1.789        |
| <b>Improper Dihedral</b>                             | 1.175       | 1.163       | 1.211        | 1.255        |
| <b>Distribution</b>                                  |             |             |              |              |

**Table S3. Homology model quality indicators for representative structures of TnC+Ca<sup>2+</sup> in complex with Tnl<sub>sw</sub>.**

|                                                      | cTnC (18°C) | cTnC (28°C) | ssTnC (18°C) | ssTnC (28°C) |
|------------------------------------------------------|-------------|-------------|--------------|--------------|
| <b>RAMPAGE</b>                                       |             |             |              |              |
| <b>Favored</b>                                       | 99 (99.00%) | 96 (96.00%) | 94 (94.00%)  | 98 (98.00%)  |
| <b>Allowed</b>                                       | 1 (1.00%)   | 4 (4.00%)   | 6 (6.00%)    | 2 (2.00%)    |
| <b>Outlier</b>                                       | 0 (0.00%)   | 0 (0.00%)   | 0 (0.00%)    | 0 (0.00%)    |
| <b>PROCHECK</b>                                      |             |             |              |              |
| <b>Bad Backbone Bonds</b>                            | 0.00%       | 0.20%       | 0.00 %       | 0.00%        |
| <b>Bad Backbone Angles</b>                           | 4.30%       | 4.30%       | 5.00%        | 6.40%        |
| <b>Bad Contacts</b>                                  | 0.00%       | 0.00%       | 0.00%        | 0.00%        |
| <b>Molprobit Score</b>                               | 1.22        | 1.59        | 1.93         | 2.25         |
| <b>QMEAN Score</b>                                   | 0.563       | 0.512       | 0.515        | 0.463        |
| <b>Whatcheck Structure Z-Score</b>                   |             |             |              |              |
| <b>1st Generation Packing</b>                        | -1.027      | -0.607      | -1.175       | -1.329       |
| <b>2n Generation Packing</b>                         | 0.614       | 0.548       | -1.175       | -0.09        |
| <b>χ<sub>1</sub>/χ<sub>2</sub> Rotamer Normality</b> | -1.924      | 1.122       | -0.118       | -2.428       |
| <b>Backbone Conformation</b>                         | 0.856       | 0.959       | -1.724       | 1.234        |
| <b>Inside/Outside</b>                                | 0.988       | 0.959       | 0.928        | 1.077        |
| <b>Whatcheck RMS Z-Score</b>                         |             |             |              |              |
| <b>Bond Lengths</b>                                  | 0.505       | 0.600       | 0.485        | 0.547        |
| <b>Bond Angles</b>                                   | -1.027      | 1.157       | 1.216        | 1.223        |
| <b>Omega Angle Restraints</b>                        | 1.297       | 1.419       | 1.608        | 1.638        |
| <b>Side Chain Planarity</b>                          | 2.012       | 1.767       | 1.972        | 2.083        |
| <b>Improper Dihedral Distribution</b>                | 1.305       | 1.19        | 1.447        | 1.281        |



Table S4. Homology model quality indicators for representative structures of Ca<sup>2+</sup>-free TnC from 1  $\mu$ s simulations.

|                                    | cTnC (18°C) | cTnC (28°C) | ssTnC (18°C) | ssTnC (28°C) |
|------------------------------------|-------------|-------------|--------------|--------------|
| <b>RAMPAGE</b>                     |             |             |              |              |
| Favored                            | 85 (98.80%) | 83 (96.50%) | 84 (97.70%)  | 84 (97.70%)  |
| Allowed                            | 1 (1.20%)   | 3 (3.50%)   | 2 (23.00%)   | 2 (23.00%)   |
| Outlier                            | 0 (0.00%)   | 0 (0.00%)   | 0 (0.00%)    | 0 (0.00%)    |
| <b>PROCHECK</b>                    |             |             |              |              |
| Bad Backbone Bonds                 | 0.00%       | 0.00%       | 0.00%        | 0.00%        |
| Bad Backbone Angles                | 5.60%       | 4.60%       | 4.30%        | 4.60%        |
| Bad Contacts                       | 0.00%       | 0.00%       | 0.00%        | 0.00%        |
| <b>Molprobrity Score</b>           |             |             |              |              |
|                                    | 0.83        | 0.82        | 0.57         | 1.37         |
| <b>QMEAN Score</b>                 |             |             |              |              |
|                                    | 0.842       | 0.605       | 0.794        | 0.72         |
| <b>Whatcheck Structure Z-Score</b> |             |             |              |              |
| 1st Generation Packing             | -0.916      | -0.814      | -0.855       | -1.237       |
| 2n Generation Packing              | -0.658      | -0.518      | -0.365       | -1.074       |
| $\chi_1/\chi_2$ Rotamer Normality  | -2.497      | -2.265      | -1.093       | -0.818       |
| Backbone Conformation              | 1.771       | 1.23        | 1.23         | 0.934        |
| Inside/Outside                     | 0.961       | 0.984       | 0.982        | 0.955        |
| <b>Whatcheck RMS Z-Score</b>       |             |             |              |              |
| Bond Lengths                       | 0.513       | 0.553       | 0.551        | 0.501        |
| Bond Angles                        | 1.156       | 1.241       | 1.17         | 1.232        |
| Omega Angle Restraints             | 1.428       | 1.377       | 1.512        | 1.38         |
| Side Chain Planarity               | 1.524       | 1.69        | 1.774        | 1.496        |
| Improper Dihedral Distribution     | 1.177       | 1.206       | 1.16         | 1.224        |

**Table S5. Homology model quality indicators for representative structures of TnC+Ca<sup>2+</sup> from 1  $\mu$ s simulations.**

|                                                     | cTnC (18°C) | cTnC (28°C) | ssTnC (18°C) | ssTnC (28°C) |
|-----------------------------------------------------|-------------|-------------|--------------|--------------|
| <b>RAMPAGE</b>                                      |             |             |              |              |
| <b>Favored</b>                                      | 84 (97.70%) | 85 (98.80%) | 81 (94.20%)  | 85 (98.80%)  |
| <b>Allowed</b>                                      | 2 (23.00%)  | 1 (1.20%)   | 5 (5.80%)    | 1 (1.20%)    |
| <b>Outlier</b>                                      | 0 (0.00%)   | 0 (0.00%)   | 0 (0.00%)    | 0 (0.00%)    |
| <b>PROCHECK</b>                                     |             |             |              |              |
| <b>Bad Backbone Bonds</b>                           | 0.00%       | 0.00%       | 0.00%        | 0.00%        |
| <b>Bad Backbone Angles</b>                          | 7.10%       | 7.60%       | 6.10%        | 4.40%        |
| <b>Bad Contacts</b>                                 | 0.00%       | 0.00%       | 0.00%        | 0.00%        |
| <b>Molprobrity Score</b>                            | 1.2         | 0.57        | 1.08         | 0.81         |
| <b>QMEAN Score</b>                                  | 0.664       | 0.584       | 0.718        | 0.684        |
| <b>Whatcheck Structure Z-Score</b>                  |             |             |              |              |
| <b>1st Generation Packing</b>                       | -0.875      | -1.506      | -2.138       | -0.616       |
| <b>2n Generation Packing</b>                        | -0.398      | -1.155      | -2.061       | -0.606       |
| <b><math>\chi_1/\chi_2</math> Rotamer Normality</b> | -3.038      | -2.781      | -3.188       | -2.315       |
| <b>Backbone Conformation</b>                        | 1.06        | 1.013       | 0.356        | 0.948        |
| <b>Inside/Outside</b>                               | 1.019       | 0.985       | 0.993        | 0.95         |
| <b>Whatcheck RMS Z-Score</b>                        |             |             |              |              |
| <b>Bond Lengths</b>                                 | 0.488       | 0.525       | 0.542        | 0.495        |
| <b>Bond Angles</b>                                  | 1.265       | 1.273       | 1.209        | 1.122        |
| <b>Omega Angle Restraints</b>                       | 1.73        | 1.554       | 1.57         | 1.786        |
| <b>Side Chain Planarity</b>                         | 2.332       | 1.775       | 1.686        | 1.797        |
| <b>Improper Dihedral Distribution</b>               | 1.441       | 1.31        | 1.224        | 1.258        |

**Table S6. Cumulative interhelical angle frequencies combined over replicated long timescale simulations.**

| <b>Paralog</b>         | <b>cTnC</b> | <b>cTnC</b> | <b>cTnC</b> | <b>cTnC</b> | <b>ssTnC</b> | <b>ssTnC</b> | <b>ssTnC</b> | <b>ssTnC</b> |
|------------------------|-------------|-------------|-------------|-------------|--------------|--------------|--------------|--------------|
| <b>Temperature</b>     | <b>18°C</b> | <b>28°C</b> | <b>18°C</b> | <b>28°C</b> | <b>18°C</b>  | <b>28°C</b>  | <b>18°C</b>  | <b>28°C</b>  |
| <b>Ca<sup>2+</sup></b> |             |             | +           | +           |              |              | +            | +            |
| <b>&lt;90</b>          | 0           | 0           | 0           | 0           | 0            | 0            | 0            | 0            |
| <b>&lt;95</b>          | 0           | 0           | 0           | 10          | 0            | 0            | 0            | 0            |
| <b>&lt;100</b>         | 0           | 0           | 0           | 66          | 0            | 0            | 0            | 0            |
| <b>&lt;105</b>         | 0           | 7           | 0           | 283         | 0            | 0            | 0            | 1            |
| <b>&lt;110</b>         | 0           | 36          | 0           | 876         | 0            | 0            | 0            | 4            |
| <b>&lt;115</b>         | 2           | 121         | 0           | 1743        | 2            | 4            | 10           | 56           |
| <b>&lt;120</b>         | 25          | 447         | 1           | 2920        | 13           | 24           | 114          | 210          |
| <b>&lt;125</b>         | 205         | 2147        | 19          | 7330        | 109          | 540          | 1056         | 1189         |
| <b>&lt;130</b>         | 3123        | 9532        | 216         | 12210       | 2426         | 5932         | 5761         | 5745         |
| <b>&gt;130</b>         | 21666       | 15420       | 24744       | 5412        | 22456        | 18497        | 18142        | 18059        |

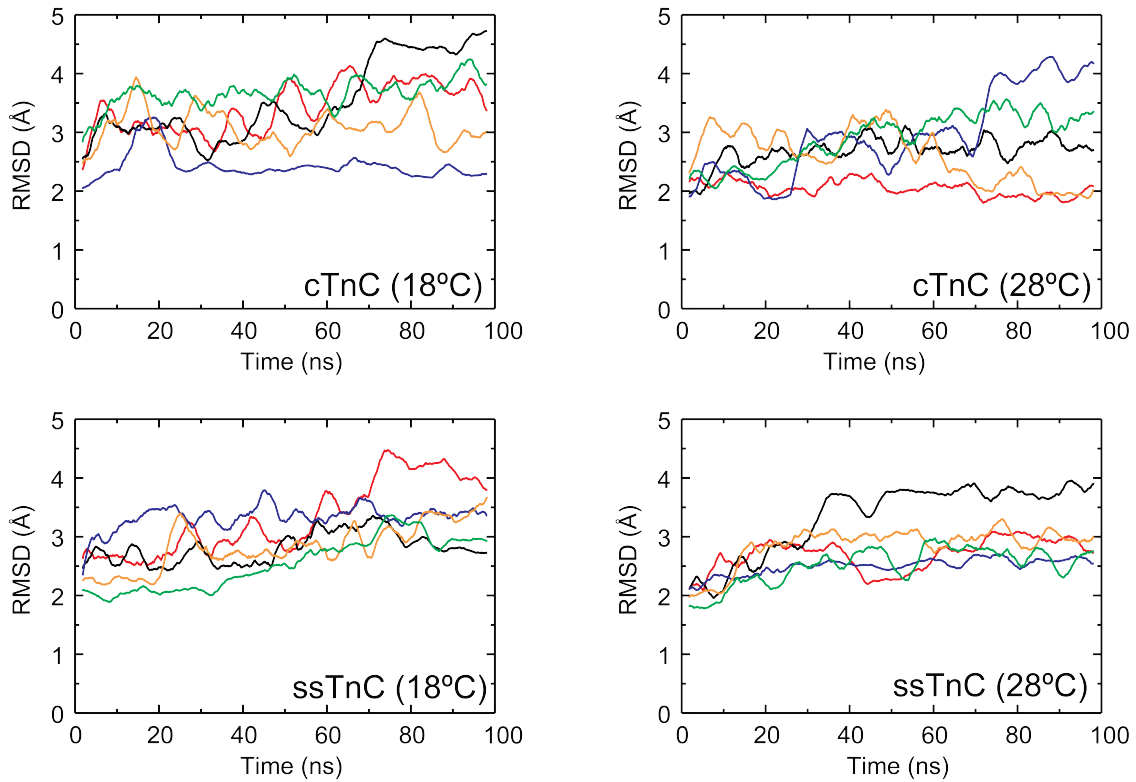

**Figure S1. RMSD as a function of time for 100 ns simulations of TnC+Ca<sup>2+</sup> that preceded PMF calculations for each temperature paralog combination. These indicate that each of the simulations has diverged substantially from the starting coordinates. Plots are a running average over 0.5% of the total number of data points.**

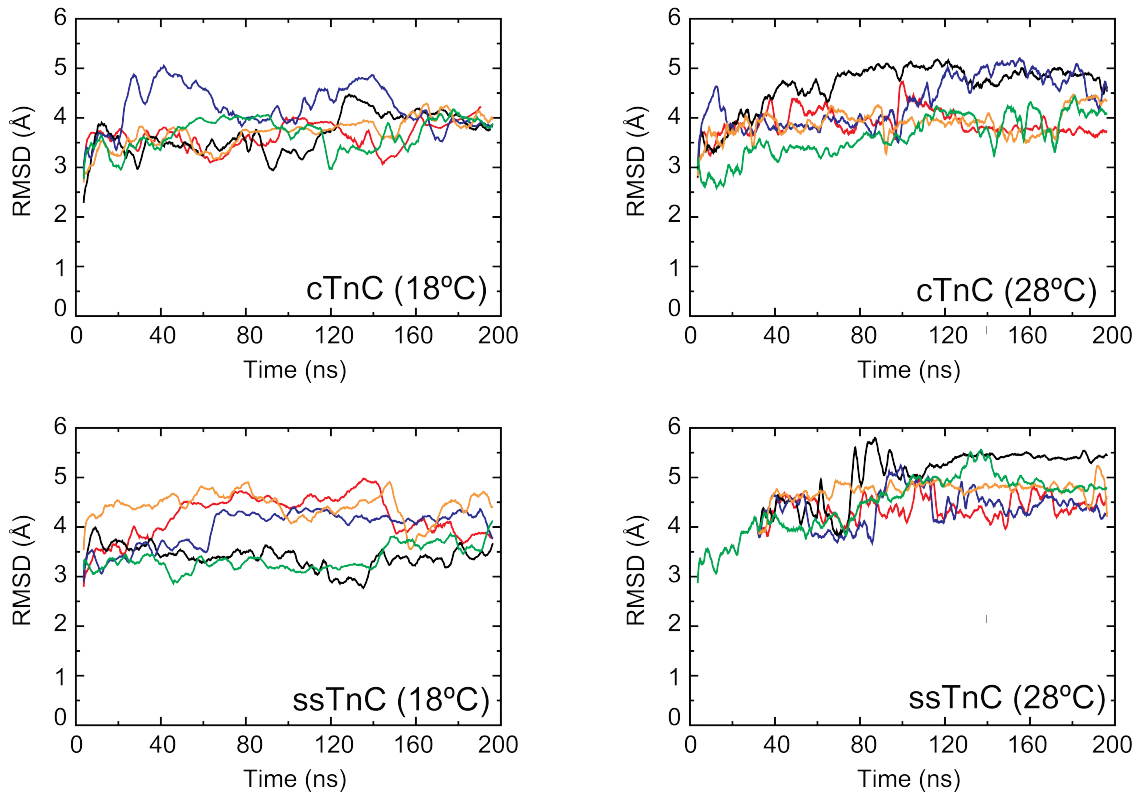

**Figure S2. RMSD as a function of time for 200 ns simulations of  $TnI_{sw}+TnC+Ca^{2+}$  for each temperature paralog combination. These indicate that each of the simulations has diverged substantially from the starting coordinates. Plots are a running average over 0.5% of the total number of data points.**

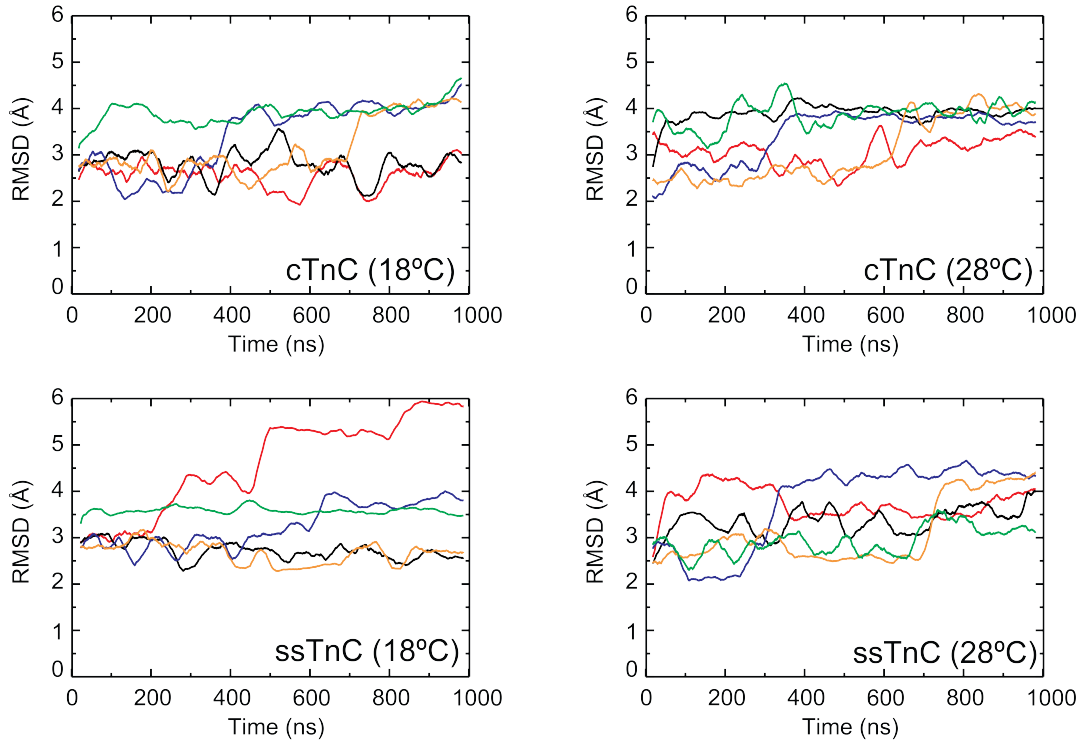

**Figure S3. RMSD as a function of time for 1  $\mu$ s simulations of TnC+Ca<sup>2+</sup> for each temperature paralog combination. These indicate that each of the simulations has diverged substantially from the starting coordinates. Plots are a running average over 0.5% of the total number of data points.**

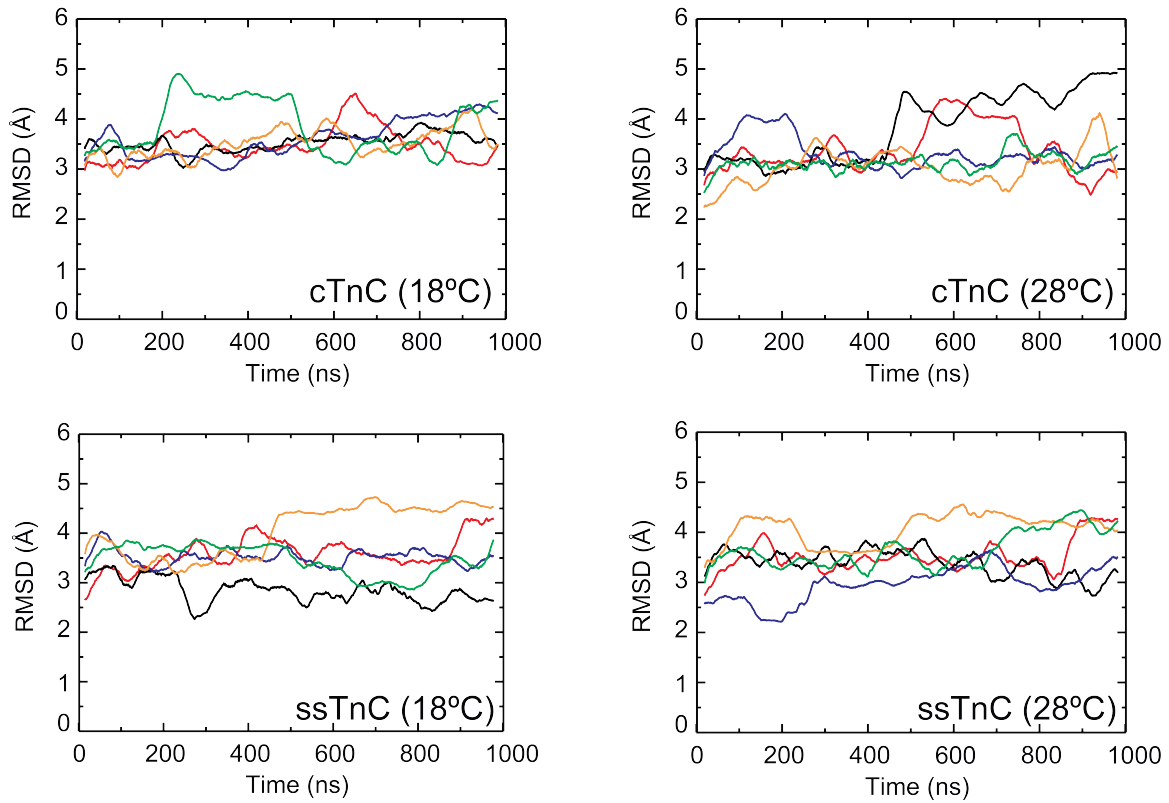

**Figure S4. RMSD as a function of time for 1  $\mu$ s simulations of TnC in the absence of  $\text{Ca}^{2+}$  for each temperature paralog combination. These indicate that each of the simulations has diverged substantially from the starting coordinates. Plots are a running average over 0.5% of the total number of data points.**

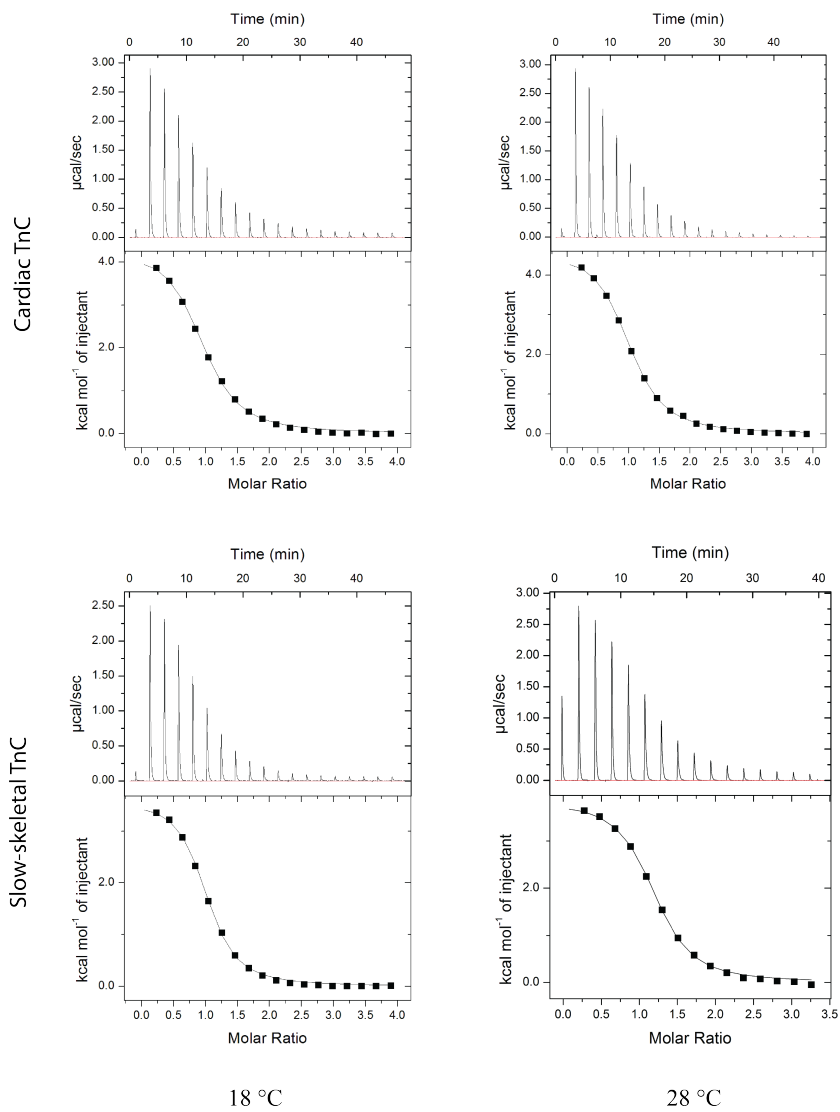

**Figure S5. Representative ITC binding isotherms show the interaction between N-TnC and  $\text{Ca}^{2+}$  for each TnC paralog at each temperature. Thermodynamic parameters and  $K_d$  values are listed in Table 4.**
